1 **Immune complex solubility and size govern Fc-gamma receptor responses:**

2 **A scalable cell-based reporter system**

3

4 Haizhang Chen<sup>1,2</sup>, Andrea Maul-Pavicic<sup>3,4</sup>, Martin Holzer<sup>5</sup>, Ulrich Salzer<sup>3</sup>, Nina Chevalier<sup>3</sup>,  
5 Reinhard E. Voll<sup>3,4</sup>, Hartmut Hengel<sup>1,2,\*</sup> & Philipp Kolb<sup>1,2,\*</sup>

6

7 <sup>1</sup>Institute of Virology, University Medical Center, Albert-Ludwigs-University Freiburg,  
8 Hermann-Herder-Str. 11, 79104 Freiburg, Germany

9 <sup>2</sup>Faculty of Medicine, Albert-Ludwigs-University Freiburg, 79104 Freiburg, Germany

10 <sup>3</sup>Department of Rheumatology and Clinical Immunology, Medical Center - University of  
11 Freiburg, Faculty of Medicine, University of Freiburg, Hugstetterstr. 55, 79106 Freiburg,  
12 Germany

13 <sup>4</sup>Center for Chronic Immunodeficiency (CCI), Medical Center-University of Freiburg, Faculty  
14 of Medicine, University of Freiburg, Breisacherstr. 115, 79106 Freiburg, Germany

15 <sup>5</sup>Institute for Pharmaceutical Sciences, Albert-Ludwigs-University Freiburg, Hermann-  
16 Herder-Str. 9, 79104 Freiburg, Germany

17

18 \*corresponding authors (Hartmut.hengel@uniklinik-freiburg.de)

19

20 **One Sentence Summary:** This study reveals selective activation of individual Fc-gamma  
21 receptors by soluble but not immobilized immune complexes, establishing a novel biomarker  
22 for autoimmune disease in humans and mouse models.

23

24

25 **Abstract:** Fc-gamma receptor (Fc $\gamma$ R) activation by soluble IgG immune complexes (sICs) is  
26 thought to be a major mechanism of inflammation in certain autoimmune diseases such as  
27 systemic lupus erythematosus (SLE). A robust and scalable test system allowing for the  
28 detection and quantification of sIC bioactivity is missing. Therefore, we developed a  
29 comprehensive reporter cell panel capable of measuring the sIC-mediated activation of  
30 individual human and mouse Fc $\gamma$ Rs. We show that compared to human Fc $\gamma$ Rs IIB and III,  
31 human Fc $\gamma$ Rs I and IIA lack sensitivity to sICs. Further, the assay proved to be sensitive to  
32 sIC stoichiometry and size enabling us to demonstrate for the first time a complete translation  
33 of the Heidelberger-Kendall precipitation curve to Fc $\gamma$ R responsiveness. This was validated  
34 using primary immune cells. The approach was applied to quantify sIC-mediated Fc $\gamma$ R  
35 activation using sera from SLE patients or from mouse models of lupus and arthritis. Thus, in  
36 clinical practice, it can be employed as a toolbox enabling the evaluation of Fc $\gamma$ R activation  
37 by sICs as a biomarker for disease activity in immune-complex mediated diseases.

38

## 39 **Introduction**

40 Immunoglobulin G (IgG) is the dominant immunoglobulin isotype in chronic infections and  
41 in antibody-mediated autoimmune diseases. The multi-faced effects of the IgG molecule rely  
42 both on the F(ab) regions, which recognize a specific antigen to form immune complexes  
43 (ICs), and the constant Fc region (Fc $\gamma$ ), which is detected by Fc $\gamma$  receptors (Fc $\gamma$ Rs) found on  
44 most cells of the immune system (*1*). When IgG binds to its antigen ICs are formed, which,  
45 depending on the respective antigen, are either cell-bound or soluble (sICs). The composition  
46 of sICs is dependent on the number of epitopes recognized by IgG on a single antigen  
47 molecule and the ability of the antigen to form multimers. Fc $\gamma$ -Fc $\gamma$ R binding is necessary but  
48 not sufficient to activate Fc $\gamma$ Rs since physical receptor cross-linking generally underlies  
49 receptor activation (*2-5*). Firmly fixed cell bound ICs are readily able to cross-link Fc $\gamma$ Rs (*4*,  
50 *6*). This condition induces various signaling pathways (*7-9*) which in turn regulate immune

51 cell effector functions (10, 11). It is also suggested that sICs can dynamically tune Fc $\gamma$ R  
52 triggering, implying that changes in sIC size directly impact Fc $\gamma$ R responses (6). However,  
53 the molecular requirements are largely unknown. Also, a functional reproduction of the  
54 paradigmatic Heidelberger-Kendall precipitation curve, describing that the molecular size of  
55 sICs determined by the antibody:antigen ratio dynamically tunes Fc $\gamma$ R activation on and off  
56 (12, 13), is so far missing.

57 In contrast to Fc $\gamma$ R binding of monomeric ligands without consequences, IC-mediated Fc $\gamma$ R  
58 cross-linking initiates the full signal cascade followed by immune cell activation or inhibition,  
59 resp. (5, 8, 14, 15). Human Fc $\gamma$ Rs are membrane resident receptors recognizing Fc $\gamma$ . Among  
60 all type I Fc $\gamma$ Rs, Fc $\gamma$ RIIB (CD32B) is the only inhibitory one signaling via immunoreceptor  
61 tyrosine-based inhibitory motifs (ITIMs) while the activating receptors are associated with  
62 immunoreceptor tyrosine-based activation motifs (ITAMs). Another exception is Fc $\gamma$ RIIIB  
63 (CD16B), which is glycosylphosphatidylinositol (GPI)-anchored (16-19). Fc $\gamma$ RI (CD64) is the  
64 only receptor with high affinity binding to monomeric IgG not associated with antigen and is  
65 primarily tasked with phagocytosis linked to antigen processing and pathogen clearance (20,  
66 21). All the other Fc $\gamma$ Rs only efficiently bind to complexed, meaning antigen-bound IgG (1,  
67 16, 17). While Fc $\gamma$ RI, Fc $\gamma$ RIIB and Fc $\gamma$ RIIIA are able to recognize sICs, this has not been  
68 reported for Fc $\gamma$ RIIA (CD32A), rather this receptor has recently been shown to depend on the  
69 neonatal Fc receptor (FcRn) or Fc $\gamma$ RIIIB (CD16B) to do so (22, 23). Activation of Fc $\gamma$ Rs  
70 leads to a variety of cellular effector functions such as antibody-dependent cellular  
71 cytotoxicity (ADCC) by natural killer (NK) cells via Fc $\gamma$ RIIIA, antibody-dependent cellular  
72 phagocytosis (ADCP) by macrophages via Fc $\gamma$ RI, cytokine and chemokine secretion by NK  
73 cells and macrophages via Fc $\gamma$ RIIIA. Further effector responses are reactive oxygen species  
74 (ROS) production of neutrophils and neutrophil extracellular traps formation (NETosis) via  
75 Fc $\gamma$ RIIIB, dendritic cell (DC) maturation and antigen presentation via Fc $\gamma$ RIIA and B cell  
76 selection and differentiation via Fc $\gamma$ RIIB (10, 24-30). Consequently, Fc $\gamma$ Rs connect and

77 regulate both innate and adaptive branches of the immune system. Various factors have been  
78 indicated to influence the IC-dependent Fc $\gamma$ R activation profiles, including Fc $\gamma$ -Fc $\gamma$ R binding  
79 affinity and avidity (31), IgG subclass, glycosylation patterns and genetic polymorphism (4,  
80 24, 25, 32), stoichiometry of antigen-antibody-ratio (6, 30, 33) and Fc $\gamma$ R clustering patterns  
81 (34). Specifically, Asn297-linked glycosylation patterns of the IgG Fc domain initiate either  
82 pro- or anti-inflammatory effector pathways by tuning the binding affinity to activating versus  
83 inhibitory Fc $\gamma$ Rs, respectively (35). However, despite being explored in proof-of-concept  
84 studies, the functional consequences of these ligand features on a specific receptor are still not  
85 fully understood. Therefore, an assay platform allowing for the systematic functional  
86 assessment of IC-mediated Fc $\gamma$ R activation is strongly required. While a previously  
87 developed cell-based assay addresses sIC-mediated activation of the inhibitory Fc $\gamma$ RIIB (36),  
88 a platform allowing for the comprehensive analysis of all Fc $\gamma$ Rs is missing.

89 sICs and immobilized ICs represent different stimuli for the immune system (22, 29). Soluble  
90 circulating ICs are commonly associated with certain chronic viral or bacterial infections (37,  
91 38) and autoimmune diseases, such as systemic lupus erythematosus (SLE) or rheumatoid  
92 arthritis (RA) (39-41). When accumulating and deposited in tissues sICs can cause local  
93 damage due to inflammatory responses, classified as type III hypersensitivity (42). Typically,  
94 sICs related disorders are characterized by systemic cytokine secretion which can be followed  
95 by immune cell exhaustion and senescence (43, 44). In order to study sIC-dependent  
96 activation of Fc $\gamma$ Rs in detail, we employed a cell-based assay which has been previously  
97 utilized to study immobilized ICs (45) and adapted it into a sIC sensitive reporter system  
98 capable of distinguishing the activation of individual Fc $\gamma$ Rs and their responses to varying  
99 complex size. This approach allowed for the first time a complete reproduction of the  
100 Heidelberger-Kendall precipitation curve measuring actual Fc $\gamma$ R triggering. The assay  
101 enables a quantification of clinically relevant sICs in sera from SLE patients and autoimmune-

102 prone mice with immune-complex-mediated arthritis and lupus using reporter cells expressing  
103 chimeric mouse Fc $\gamma$ Rs.

104

## 105 **Results**

### 106 *Experimental assay setup*

107 The assay used in this study was adapted from a previously described cell-based Fc $\gamma$ R  
108 activation assay designed to measure receptor activation in response to opsonized virus  
109 infected cells (45) or therapeutic Fc-fusion proteins (46). We complemented the assay setup to  
110 enable measurement of sICs when incubated with reporter cells stably expressing the  
111 ectodomains of the human Fc $\gamma$ R fused to the signaling module of the mouse CD3- $\zeta$  chain  
112 (Fc $\gamma$ RI: Acc# X14356; Fc $\gamma$ RIIA(R): Acc# X62572; Fc $\gamma$ RIIB/C: Acc# X52473; Fc $\gamma$ RIIIA(V):  
113 Acc# LT737365). Ectodomains of Fc $\gamma$ RIIB and Fc $\gamma$ RIIC are identical. Second generation  
114 reporter cells were generated to improve stable expression of chimeric Fc $\gamma$ Rs compared to the  
115 transfectants used in the original assay (45). To this end, BW5147 cells were transduced as  
116 described previously via lentiviral transduction (45, 47). Human Fc $\gamma$ R expression on  
117 transduced cells after puromycin selection is shown in Fig. 1A. Fc $\gamma$ R triggering is translated  
118 into activation of the reporter cells and measured by quantification of endogenous IL-2 (mIL-  
119 2) secretion into the cell culture supernatant using an anti-IL-2 sandwich ELISA as described  
120 previously (45). In order to employ the original assay, designed to detect ICs on adherent  
121 virus-infected cells, for the detection of soluble ICs we first determined the suspension of IgG  
122 achieved by pre-incubating a 96 well ELISA microtiter plate with PBS/FCS blocking buffer.  
123 To this end, we compared graded concentrations of FCS in the blocking reagent and measured  
124 the threshold at which IgG (rituximab, Rtx) was no longer adsorbed to the plate and stayed  
125 abundantly in solution. Fig. 1B demonstrates that FCS supplementation to 1% (v/v) or higher  
126 is sufficient to keep IgG antibodies in solution and prevents binding to the plastic surface.  
127 Using this adapted protocol, the assay now allowed for the sensitive detection and

128 characterization of FcγR interaction with immobilized ICs versus sICs as shown  
129 schematically in Fig. 1C. First, we set out to test if monomeric IgG upon immobilization  
130 becomes an operational surrogate for IgG-opsonized cells or immobilized ICs with regard to  
131 FcγR activation as suggested before (48). As depicted in Fig. 2, there was no qualitative  
132 difference in FcγR activation between immobilized Rtx, immobilized ICs (Rtx + rec. CD20)  
133 or Rtx-opsonized 293T-CD20 cells, showing that FcγR cross-linking by clustered IgG alone is  
134 sufficient for receptor cross-linking and activation. In contrast, sICs formed by monomeric  
135 CD20 peptide (aa 141-188) and Rtx failed to activate FcγRs even at very high ligand  
136 concentrations. Based on this finding we hypothesized that, in order to generate sICs able to  
137 activate FcγRs, antigens have to be multivalent to achieve cross-linking of FcγRs. Of note, to  
138 reliably and accurately differentiate between soluble and immobilized triggers using this  
139 assay, reagents for the generation of ICs need to be of very high purity and consistent  
140 stability. Indeed, only combinations of pharmaceutical therapy grade, i.e. ultra-pure mAbs and  
141 pure antigens (purified via size exclusion chromatography) showed reproducible, dose-  
142 dependent and specific activation in the reporter assay (data not shown).

143

#### 144 *Quantification of human FcγR responsiveness to multimeric sICs*

145 To date, there are only few commercially available human IgG-antigen pairs that meet both  
146 the above mentioned high grade purity requirements while also providing a multimeric  
147 antigen. In order to meet these stipulations of ultra-pure synthetic soluble immune complexes  
148 we focused on three pairs of multivalent antigens and their respective mAbs that were  
149 available in required amounts enabling large-scale titration experiments; trimeric  
150 rhTNFα:IgG1 infliximab (TNFα:Ifx), dimeric rhVEGFA: IgG1 bevacizumab (VEGFA/Bvz)  
151 and dimeric rhIL-5: IgG1 mepolizumab (IL-5/Mpz). As lymphocytes express TNFα-receptors  
152 I and II while not expressing receptors for IL-5 or VEGFA, we tested whether the mouse  
153 lymphocyte derived BW5147 thymoma reporter cell line is sensitive to high concentrations of

154 rhTNF $\alpha$ . Toxicity testing revealed that even high concentrations up to 76.75 nM rhTNF $\alpha$  did  
155 not affect viability of reporter cells (Fig. S1). Next, we measured the dose-dependent  
156 activation of human Fc $\gamma$ R<sub>s</sub> comparing immobilized IgG to soluble ICs using the Fc $\gamma$ R  
157 reporter cell panel (Fig. 3). Soluble antigen or mAb alone served as negative controls showing  
158 no background activation even at high concentrations. Immobilized rituximab served as a  
159 positive control for inter-experimental reference. We observed that all Fc $\gamma$ R<sub>s</sub> are strongly  
160 activated in a dose-dependent manner when incubated with immobilized IgG. Incubating the  
161 Fc $\gamma$ R reporter cells with sICs at identical molarities showed Fc $\gamma$ R<sub>IIIB/C</sub> and Fc $\gamma$ R<sub>IIIA</sub> to be  
162 efficiently activated by sICs, while in contrast, Fc $\gamma$ R<sub>IIA</sub> and Fc $\gamma$ R<sub>I</sub> did not respond to sICs.  
163 We furthermore observed Fc $\gamma$ R<sub>IIIA</sub> to be efficiently activated by sICs with responses even  
164 surpassing those achieved with immobilized IgG for TNF $\alpha$ /I $\alpha$ x and IL-5/Mp $\zeta$  ICs. Fc $\gamma$ R<sub>IIIB/C</sub>  
165 showed a generally weaker reactivity towards sICs compared to immobilized ICs, especially  
166 at high concentrations whereas an inversion of this order was seen for TNF $\alpha$ /I $\alpha$ x and  
167 VEGFA/Bv $\zeta$  ICs at lower concentrations. IL-5/Mp $\zeta$ , Fc $\gamma$ R<sub>IIIB/C</sub> and Fc $\gamma$ R<sub>IIIA</sub> showed  
168 similar responsiveness towards immobilized or sICs with a generally stronger activation on  
169 immobilized ICs. These findings demonstrate that sICs of different composition vary in the  
170 resulting Fc $\gamma$ R activation pattern, most likely due to the antigens being either dimeric, trimeric  
171 or different in size. As we observed differences in responses to sICs vs. immobilized ICs for  
172 individual Fc $\gamma$ R- $\zeta$  reporter cells, this indicates that Fc $\gamma$ R ectodomains alone are already able  
173 to differentiate between these triggers. To validate this observation in principle, we  
174 determined Fc $\gamma$ R<sub>IIIA</sub> activation using primary human NK cells isolated from PBMCs of  
175 healthy donors. NK cells were chosen as they mostly express only one type of Fc $\gamma$ R similar to  
176 our reporter system. Measuring a panel of activation markers and cytokine responses by flow  
177 cytometry, we observed a differential activation pattern depending on ICs being soluble or  
178 immobilized at equal molarity (Fig. 4A). We chose IL-5/Mp $\zeta$  sICs as NK cells do not express  
179 the IL-5 receptor. While MIP1- $\beta$  responses were comparable between the two triggers,

180 degranulation (CD107a) and TNF $\alpha$  responses showed a trend towards lower activation by  
181 sICs compared to immobilized IgG (Mpz). Strikingly, IFN $\gamma$  responses were significantly  
182 weaker when NK cells were incubated with sICs compared to immobilized IgG. In order to  
183 confirm this hierarchy of responses and to enhance the overall low activation by Fc $\gamma$   
184 compared to the PMA control, we changed the IC setup by generating reverse-orientation  
185 sICs consisting of human Fc $\gamma$ R-specific mouse mAbs and goat-anti-mouse IgG F(ab)<sub>2</sub>  
186 fragments. NK cell activation by reverse sICs was compared to NK cell activation by  
187 immobilized Fc $\gamma$ R specific mAbs (Fig. 4B). Here, we not only confirm our previous  
188 observations regarding MIP-1 $\beta$  and IFN $\gamma$ , but we also confirm significantly lower TNF $\alpha$  and  
189 CD107a responses towards soluble complexes compared to immobilized mAbs. Importantly,  
190 these experiments validate that sICs readily activate primary NK cells and induce  
191 immunological effector functions. As in roughly 10% of the population NK cells express  
192 Fc $\gamma$ RIIC (49-52), we also tested if this receptor plays a role in our measurements. Using the  
193 same three donors and an Fc $\gamma$ RII specific mAb as described above, we did not observe an  
194 Fc $\gamma$ RII-mediated response. Accordingly, we conclude that Fc $\gamma$ RIIC expression did not play a  
195 role in our experiments (Fig. 4C). Taken together, we show that multivalent but not dimeric  
196 soluble immune complexes govern primary NK cell response and Fc $\gamma$ RIIIA activation (Fig.  
197 2A).

198

#### 199 *Measurement of Fc $\gamma$ R activation in response to changing sIC size*

200 We observed that the dimeric sIC CD20:Rtx molecule complex completely failed to trigger  
201 Fc $\gamma$ Rs, while potentially larger sICs based on multimeric antigens showed an efficient dose-  
202 dependent Fc $\gamma$ R activation. In order to determine whether BW5147 Fc $\gamma$ R- $\zeta$  reporter cells are  
203 able to respond to changes in sIC size, we tested cross-titrated amounts of antibody (mAb,  
204 infliximab, Ix) and antigen (Ag, rhTNF $\alpha$ ). To this end, the reporter cells were incubated with  
205 sIC of different mAb:Ag ratios by fixing one parameter and titrating the other. According to



206 the Heidelberger-Kendall precipitation curve (12) describing sIC size as being dependent on  
207 the mAb:Ag ratio, this should result in varying sIC sizes as an excess of either antigen or  
208 antibody results in the formation of smaller complexes compared to the large molecular  
209 complexes formed at around equal molarity. Changes in sIC size due to a varying mAb:Ag  
210 ratio were quantified using asymmetrical flow-field flow fractionation (AF4) (Fig. 5A and  
211 Table S1). Fig. S2 shows a complete run of such an analysis. AF4 analysis identifies the  
212 highest sIC mean molecular being approximately 2130 kDa at a 1:3 ratio (mAb Ix : Ag TNF-  
213  $\alpha$ ) with sICs getting smaller with increasing excess of either antigen or antibody,  
214 recapitulating a Heidelberger-Kendall-like curve. Incubation of the Fc $\gamma$ R reporter cells with  
215 ICs of varying size indeed shows that the assay is sensitive to exactly monitor changes in sIC  
216 size (Fig. 5B). Accordingly, both Fc $\gamma$ R types showed the strongest responses at mAb:Ag  
217 ratios of approximately 1:3. We then set out to test the accuracy of our reporter cell assay as a  
218 surrogate for primary human immune cells expressing Fc $\gamma$ Rs. To this end, we tested primary  
219 NK cells from three individual donors and measured NK cell MIP1- $\beta$  upregulation in  
220 response to synthetic sICs of varying size and composition again using a similar assay setup  
221 optimized for NK cell activation. We chose MIP-1 $\beta$  upregulation as a cell surface marker to  
222 measure NK cell activation as it showed the highest responsiveness in previous experiments  
223 (Fig. 4). We could observe that primary immune cells expressing Fc $\gamma$ RIIIA respond to IC  
224 size, confirming our assay to be an accurate surrogate for primary immune cell responses to  
225 soluble ICs (Fig. 5C). Convincingly, NK cell responses to sICs generated from trimeric  
226 antigen (rhTNF $\alpha$ ) peaked at a different mAb:Ag ratio compared to NK cell responses to sICs  
227 generated from dimeric antigens (rhIL-5 and rhVEGFA). Of note, TNF $\alpha$  and VEGFA activate  
228 resting NK cells thus leading to higher MIP1- $\beta$  positivity when NK cells are incubated in the  
229 presence of excess antigen. As NK cells do not express IL-5 receptor, this effect is not  
230 observed in the presence of excess IL-5. Regarding TNF $\alpha$ , NK cells still show a stronger  
231 activation by sICs generated under optimal mAb:Ag ratios compared to conditions where

232 excess antigen is used. The data reveal a direct correlation between sIC size and effector  
233 responses. Conversely, when changing antibody concentrations using fixed amounts of  
234 antigen, a consistent reduction of NK cell activation is observed in the presence of excess IgG  
235 for all three mAb/Ag pairs.

236

### 237 *Quantification of sIC bioactivity in sera of SLE patients*

238 In order to apply the assay to a clinically relevant condition associated with the occurrence of  
239 sICs we measured circulating sICs present in the serum of SLE patients with variable disease  
240 activity. Sera from 4 healthy donors and 25 SLE patients were investigated for Fc $\gamma$ RIIIA and  
241 Fc $\gamma$ RIIB/C activation. Reporter cells readily produced IL-2 in response to patient sera in a  
242 dose-dependent manner (shown exemplarily for some SLE patients, see Fig. 6A), which was  
243 not the case when sera from healthy controls were tested. Consistent with the observation that  
244 Fc $\gamma$ RI and Fc $\gamma$ RIIA do not respond to synthetic sICs, reporter cells expressing these receptors  
245 did also not respond to the tested serum samples (Fig. 6A, lower panel). While this reaction  
246 pattern already indicated that sICs are the reactive component measured in SLE patients' sera,  
247 we further demonstrate that Fc $\gamma$ RIIIA and Fc $\gamma$ RIIB/C activation depends on the presence of  
248 serum ICs by analyzing patient serum before and after polyethylene glycol (PEG)  
249 precipitation and depletion of sICs (Fig. 6B). Next, we calculated the area under the curve  
250 (AUC) values for all 25 SLE patient titrations and normalized them to the AUC values  
251 measured for healthy individuals. The resulting index values were then correlated with  
252 established biomarkers of SLE disease activity, such as anti-dsDNA titers ( $\alpha$ -dsDNA) and  
253 concentrations of the complement cleavage product C3d (Fig. 6C). We observed a significant  
254 correlation between our Fc $\gamma$ RIIIA activation index values and both of the determined disease  
255 activity markers, anti-dsDNA titers and C3d concentration ( $p=0.0465$  and  $p=0.0052$ ,  
256 respectively). Fc $\gamma$ RIIB/C on the other hand showed no significant correlation with either  
257 biomarker. We assume these interrelations may be due to the influence of IgG sialylation

258 found to be reduced in active SLE (53). Generally, de-sialylation of IgG leads to stronger  
259 binding by the activating receptors FcγRI, FcγRIIA and FcγRIII while it reduces the binding  
260 affinity of the inhibitory FcγRIIB (54). In sum, our assay allows the indirect quantification of  
261 clinically relevant sICs in sera of SLE patients.

262

### 263 *Assay application to clinically relevant in vivo lupus and arthritis mouse models*

264 BW5147 reporter cells stably expressing chimeric mouse as well as rhesus macaque FcγRs  
265 have already been generated using the here described methodology and were successfully  
266 used to measure FcγR activation by opsonized adherent cells in previous studies (47, 55)  
267 (mFcγR reporter cells). As the human FcγR reporter cells described here are sensitive to  
268 certain sICs, we next aimed to translate the assay to clinically relevant animal models. To this  
269 end, we incubated previously described FcγR reporter cells expressing chimeric mouse FcγRs  
270 (47) with sera from lupus (NZB/WF1) or arthritis (K/BxN) mice with active autoimmune  
271 disease. The reporter assay was performed as described above. We chose to measure the  
272 stimulation of the activating receptors, mFcγRIII and mFcγRIV, that correspond to human  
273 FcγRIII and show a similar cellular distribution and immune function (16). Incubation with  
274 synthetic sICs generated from rhTNFα and mouse-anti-hTNFα IgG1 showed both of the  
275 mFcγR reporter cells to be equally responsive to sICs (Fig. 7A). Parental BW5147 cells  
276 expressing no FcγRs served as a control. The sera of three mice per group were analysed and  
277 compared to sera from wildtype C57BL/6 mice, which served as a healthy control. C57BL/6  
278 mice were chosen, as healthy K/BxN or NZB/WF1 mice cannot be reliably defined. This is  
279 due to the unpredictable disease progression in these mouse models starting from a young age.  
280 We consistently detected mFcγR activation by sera from K/BxN or NZB/WF1 compared to  
281 C57BL6 mice (Fig. 7B). While the mFcγRIII responses were generally high and similar  
282 between K/BxN and NZB/WF1 mice, mFcγRIV responsiveness attended to be lower and  
283 individually more variable. Altogether, the assay enables the reliable detection of sICs in sera

284 of mice with immune-complex mediated diseases making it a promising novel tool to monitor  
285 sICs as a biomarker of disease activity.

286

## 287 **Discussion**

288 In this study we established, validated and applied a new assay system that is able for the first  
289 time to selectively detect soluble multimeric immune complexes as discrete ligands of FcγR.  
290 Major findings are i) that sICs cross-link and trigger human FcγRs IIB/C and IIIA but are  
291 neglected by activating FcγRI and IIA; ii) that sICs potency is strictly stoichiometry- and size-  
292 dependent and thus reproducing the classical Heidelberger-Kendall curve iii) that the overall  
293 functional design of FcγRs is adapted to physical cross-linking by soluble vs. membrane-  
294 bound immune complexes. The new test system has various obvious applications in medicine  
295 and pharmacy.

296

### 297 *A novel assay for the quantification of disease-associated as well as synthetic sICs*

298 The new approach presents an important and implementable advancement in immunological  
299 methodology as it enables the sensitive detection of receptor-activating ICs by a relatively  
300 simple, scalable *in vitro* bioassay with high-throughput potential. Based on our pilot study  
301 demonstrating that the sIC-mediated FcγRIIIA activation correlated with SLE disease  
302 markers, this is of great value for larger prospective clinical studies in patients with  
303 autoimmune diseases such as systemic lupus erythematosus (SLE) and rheumatoid arthritis  
304 (RA), where circulating ICs have long been shown to crucially contribute to tissue damage  
305 and disease manifestations (40, 41, 56-58). Disease-associated, endogenous sICs can also  
306 occur during infection, e.g. generated after antibody-mediated destruction of pathogenic  
307 viruses or microbes or probably more likely due to the oligomeric nature of numerous viral  
308 and bacterial structural proteins generated e.g. by SARS-CoV2 (59-61) HIV and hepatitis B  
309 virus (HBV) infection, during which circulating sICs are generated (37, 62). As the assay also

310 enables the sensitive and quantitative measurement of Fc $\gamma$ R ligand bioactivity it allows the  
311 detection of sICs not only in clinical specimens but also pharmaceutical preparations of IgG  
312 and Fc-fusion proteins for therapeutic use (46). The presence of ICs in therapeutic  
313 preparations or sIC formation following patient treatment is unwanted due to the risk of side  
314 effects such as lupus-like syndrome which has been linked to mAb treatment in patients  
315 receiving infliximab (63) or bevacizumab (64), both mAbs used in this study. As this assay is  
316 highly sensitive to any aggregation of IgG, it also represents a tool to control the purity,  
317 quality and stability of mAb preparations produced for therapeutic use in patients. In addition,  
318 the assessment of sIC-mediated Fc $\gamma$ R activation allows for optimization of mAbs and Fc-  
319 fusion proteins regarding their molecular design and manufacturing. Specifically, Fc-  
320 molecules targeting cytokines and soluble factors, which result in sIC formation, could be  
321 designed for reduced or enhanced Fc $\gamma$ R activation such as glyco-engineered mAbs or LALA-  
322 mutant mAbs (65, 66). Notably, the scalability of this cell-based test system does allow for  
323 large-scale screening of samples.

324

### 325 *sICs form Fc $\gamma$ R ligands with distinct functional profiles*

326 While immobilized ICs decorating infected cells, viral particles or microbial surfaces restrict  
327 their triggering effect to a single immune cell residing in very close vicinity, sICs can rapidly  
328 disseminate reaching a high number of immune effector cells thus developing a systemic  
329 effect with far reaching and long-lasting or even threatening consequences for the host as a  
330 whole. This could explain the very tight control of sIC governed effector programs and the  
331 unresponsiveness of activating receptors like Fc $\gamma$ RI and IIA. We also observed a difference in  
332 the response patterns for Fc $\gamma$ RIIIA and Fc $\gamma$ RII/B/C depending on the solubility of clustered  
333 IgG (immobilized versus soluble ICs) which we validated for Fc $\gamma$ RIIIA using primary human  
334 NK cells (Fig. 4 and 5C). Importantly, only multimeric but not dimeric sICs can trigger Fc $\gamma$ R  
335 activation. This highlights the fundamental structural influence of the particular antigen as

336 well as the IgG molecule on sIC dimension and subsequent FcγR-mediated signal processing.  
337 The ability of the here described assay to define and quantify the activation of individual  
338 FcγRs by sIC ligands is not achievable using primary immune cells due to redundant immune  
339 responses upon FcγR activation and complex, overlapping expression pattern of FcγRs.  
340 Finally, and in contrast to primary human cells, murine BW5147 reporter cells are largely  
341 inert to human cytokines, which provides a key advantage to measure FcγR activation  
342 selectively in human samples. Notably, the two basically sIC-responsive human FcγR types,  
343 i.e. FcγRIIIA and FcγRIIB, are either highly activating versus strongly inhibitory and thus  
344 show a mutually exclusive expression pattern (ref. review, z.B. Ravetch und Falk). FcγRIIIA  
345 mediates ADCC elicited by NK cells and the induction of a pro-inflammatory cytokine profile  
346 by CD16<sup>+</sup> monocytes, while FcγRIIB is a GPI-anchored receptor on neutrophils. FcγRIIB is  
347 an inhibitory receptor expressed by B cells and dendritic cells (DCs) regulating B cell  
348 activation, antibody production by plasma cells and the activation state of DCs, while the  
349 activating FcγRIIC is found on NK cells mediating ADCC. However, as FcγRIIC is only  
350 expressed by roughly 10% of the human population, its role is still poorly understood (49-52).  
351 Given the here shown fundamental difference in FcγR reactivity towards multimeric sICs  
352 versus immobilized IgG it is tempting to speculate that FcγRIIIA- and FcγRIIB/C-positive  
353 immune cells might have evolved to differentially perceive these different FcγR ligands (sICs  
354 versus membrane bound insoluble ICs) and translate them into distinct reaction patterns. This  
355 could be achieved by differences in receptor density, signal transduction or regulation of  
356 receptor expression. Consulting the literature indeed supports our hypothesis with neutrophils,  
357 B cells and NK cells being efficiently activated by sICs via almost identical receptor  
358 ectodomains (18, 28, 67, 68), while the immunological outcome of their triggering very much  
359 differs.

360

361

362

363 *Dynamic sIC size measurement and monitoring of bioactivity in sIC-associated diseases*

364 We provide for the first time a simultaneous functional and biophysical assessment of the  
365 paradigmatic Heidelberger-Kendall precipitation curve (12, 13). While previous work already  
366 revealed that large and small sICs differentially impacts IL-6 production in PBMCs (6), the  
367 dynamics of Fc $\gamma$ R activation resulting from constant changes in sIC size have not been  
368 explored on a systematic basis. This was undertaken in this study by directly analyzing  
369 synthetic ICs formed by highly pure recombinant components via AF4 (Fig. 5A, Fig. S2,  
370 Table S1). Our data document that sIC size is indeed governed by antibody:antigen ratios  
371 covering a wide range of sizes up to several megadaltons. In the presence of increasing  
372 amounts of antibody or antigen deviating from an optimal antibody:ratio, sIC size steadily  
373 decreases. Further, by the measurement of Fc $\gamma$ R activation we now translate sIC size directly  
374 to a simple but precise read-out. In doing so, we show that sIC size essentially tunes Fc $\gamma$ R  
375 activation on and off. Thus, our new test system can not only contribute to the functional  
376 detection and quantification of clinically relevant sICs but also provides a starting point on  
377 how to avoid pathological consequences by influencing the sIC size, for example by  
378 administering therapeutic antibodies or recombinant antigens in optimized concentrations,  
379 thus becoming relevant in clinical pharmacokinetics.

380

381 *Limitations of the reporter system and conclusions*

382 While it is known that Fc $\gamma$ RIIA requires Fc $\gamma$ RIIIB or FcRn to efficiently respond to ICs (22,  
383 23, 69), unexpectedly, we found that Fc $\gamma$ RI is not activated by sICs in our assay. We assume  
384 that Fc $\gamma$ RI interaction with sICs might require a native cellular environment given that a  
385 major function of this Fc $\gamma$ R is the uptake and processing of antigen via ICs even in the  
386 absence of a signaling motif (21). However, we find that Fc $\gamma$ RI ectodomains alone are not  
387 responsive to sICs implying a thoroughly different cross-linking threshold for Fc $\gamma$ RI

388 compared with Fc $\gamma$ RIIB and IIIA. This feature is possibly linked to its molecular architecture  
389 being the only high-affinity Fc $\gamma$ R with three extracellular Ig domains compared to the two  
390 domains found in other Fc $\gamma$ Rs with lower affinity to monomeric IgG. This observation also  
391 reflects a general consideration regarding the BW5147 reporter system. While providing a  
392 robust and uniform read-out using a scalable cell-based approach, the assay is not able to  
393 reflect native immune cell functions governed by cell-intrinsic signalling cascades. The major  
394 advancements of this reporter system include i) a higher accuracy regarding Fc $\gamma$ R activation  
395 compared to merely affinity measurements, ii) an sIC size dependent quantification of Fc $\gamma$ R  
396 responsiveness and iii) the identification of Fc $\gamma$ R activating sICs in autoimmunity and  
397 infection. Finally, this scalable, sensitive and robust system to detect Fc $\gamma$ R activating sICs in  
398 clinical samples might enable their identification in diseases that have not been linked to sIC-  
399 mediated pathology, yet.

400

## 401 **Materials and Methods**

402

403 *Cell culture:* All cells were cultured in a 5% CO<sub>2</sub> atmosphere at 37°C. BW5147 mouse  
404 thymoma cells (BW, obtained from ATCC: TIB-47) were maintained at 3x10<sup>5</sup> to 9x10<sup>5</sup>  
405 cells/ml in Roswell Park Memorial Institute medium (RPMI GlutaMAX, Gibco)  
406 supplemented with 10% (vol/vol) fetal calf serum (FCS, Biochrom), sodium pyruvate (1x,  
407 Gibco) and  $\beta$ -mercaptoethanol (0.1 mM, Gibco). 293T-CD20 (kindly provided by Irvin Chen,  
408 UCLA (70)) were maintained in Dulbecco's modified Eagle's medium (DMEM, Gibco)  
409 supplemented with 10% (vol/vol) FCS.

410

411 *Fc $\gamma$ R receptor activation assay:* Fc $\gamma$ R activation was measured adapting a previously  
412 described cell-based assay (45, 71). The assay was modified to measure Fc $\gamma$ R activation in  
413 solution. Briefly, 2x10<sup>5</sup> mouse BW-Fc $\gamma$ R (BW5147) reporter cells were incubated with



414 synthetic sICs or diluted serum in a total volume of 100  $\mu$ l for 16 h at 37°C and 5% CO<sub>2</sub>.  
415 Incubation was performed in a 96-well ELISA plate (Nunc maxisorp) pre-treated with  
416 PBS/10% FCS (v/v) for 1 h at 4°C. Immobilized IgG was incubated in PBS on the plates prior  
417 to PBS/10% FCS treatment. Reporter cell mIL-2 secretion was quantified via ELISA as  
418 described (45).

419

420 *Recombinant antigens and monoclonal antibodies to form sICs:* Recombinant human (rh)  
421 cytokines TNF, IL-5, and VEGFA were obtained from Stem Cell technologies. Recombinant  
422 CD20 was obtained as a peptide (aa141-188) containing the binding region of rituximab  
423 (Creative Biolabs). Fc $\gamma$ R-specific mAbs were obtained from Stem Cell technologies (CD16:  
424 clone 3G8; CD32: IV.3). Reverse sICs were generated from these receptor-specific antibodies  
425 using goat-anti-mouse IgG F(ab)<sub>2</sub> fragments (Invitrogen) in a 1:1 ratio. Pharmaceutically  
426 produced humanized monoclonal IgG1 antibodies infliximab (Ifx), bevacizumab (Bvz),  
427 mepolizumab (Mpz) and rituximab (Rtx) were obtained from the University Hospital  
428 Pharmacy Freiburg. Mouse anti-hTNF $\alpha$  (IgG2b, R&D Systems, 983003) was used to generate  
429 sICs reactive with mouse Fc $\gamma$ Rs. sICs were generated by incubation of antigens and  
430 antibodies in reporter cell medium or PBS for 2 h at 37°C.

431

432 *Lentiviral transduction:* Lentiviral transduction of BW5147 cells was performed as described  
433 previously (47, 55). In brief, chimeric Fc $\gamma$ R-CD3 $\zeta$  constructs (45) were cloned into a  
434 pUC2CL6IPwo plasmid backbone. For every construct, one 10-cm dish of packaging cell line  
435 at roughly 70% density was transfected with the target construct and two supplementing  
436 vectors providing the VSV gag/pol and VSV-G-env proteins (6  $\mu$ g of DNA each) using  
437 polyethylenimine (22.5  $\mu$ g/ml, Sigma) and Polybrene (4  $\mu$ g/ml; Merck Millipore) in a total  
438 volume of 7 ml (2 ml of a 15-min-preincubated transfection mix in serum-free DMEM added  
439 to 5 ml of fresh full DMEM). After a medium change, virus supernatant harvested from the

440 packaging cell line 2 days after transfection was then incubated with target BW cells  
441 overnight (3.5 ml of supernatant on  $10^6$  target cells), followed by expansion and pool  
442 selection using complete medium supplemented with 2  $\mu\text{g}/\text{ml}$  of puromycin (Sigma) over a  
443 one week culture period.

444

445 *BW5147 toxicity test:* Cell counting was performed using a Countess II (Life Technologies)  
446 according to supplier instructions. Cell toxicity was measured as a ratio between live and dead  
447 cells judged by trypan blue staining over a 16 h time frame in a 96well format (100  $\mu\text{l}$  volume  
448 per well). BW5147 cells were mixed 1:1 with Trypan blue (Invitrogen) and analysed using a  
449 Countess II. rhTNF $\alpha$  was diluted in complete medium.

450

451 *human IgG suspension ELISA:* 1  $\mu\text{g}$  of IgG1 (rituximab in PBS, 50  $\mu\text{l}/\text{well}$ ) per well was  
452 incubated on a 96well microtiter plate (NUNC Maxisorp) pre-treated (2h at RT) with PBS  
453 supplemented with varying percentages (v/v) of FCS (PAN Biotech). IgG1 bound to the  
454 plates was detected using an HRP-conjugated mouse-anti-human IgG mAb (Jackson  
455 ImmunoResearch).

456

457 *BW5147 cell flow cytometry:* BW5147 cells were harvested by centrifugation at 900 g and RT  
458 from the suspension culture.  $1 \times 10^6$  cells were stained with PE- or FITC-conjugated anti-  
459 human Fc $\gamma$ R mAbs (BD) or a PE-TexasRed-conjugated human IgG-Fc fragment (Rockland)  
460 for 1h at 4°C in PBS/3%FCS. After 3 washing steps in PBS/3%FCS, the cells were  
461 transferred to Flow cytometry tubes (BD) and analysed using BD LSR Fortessa and FlowJo  
462 (V10) software.

463

464 *NK cell activation flow cytometry:* PBMC were purified from donor blood using Lymphocyte  
465 separation Media (Anprotec). Primary NK cells were separated from donor PBMCs via

466 magnetic bead negative selection (Stem Cell technologies) and NK cell purity was confirmed  
467 via staining of CD3 (Biolegend, clone HIT3a), CD16 (Biolegend, clone 3G8) and CD56  
468 (Miltenyi Biotec, clone AF12-7H3). 96well ELISA plates (Nunc Maxisorp) were pre-treated  
469 with PBS/10% FCS (v/v) for 1 h at 4°C. NK cells were stimulated in pre-treated plates and  
470 incubated at 37°C and 5% CO<sub>2</sub> for 4 h. Golgi Plug and Golgi Stop solutions (BD) were added  
471 as suggested by supplier. CD107a (APC, BD, H4A3) specific conjugated mAb was added at  
472 the beginning of the incubation period. Following the stimulation period, MIP-1β (PE, BD  
473 Pharmigen), IFNγ (BV-510, Biolegends, 4SB3) and TNFα (PE/Cy7, Biolegends, MAB11)  
474 production was measured via intracellular staining Cytokines (BD, CytoFix/CytoPerm, Kit as  
475 suggested by the supplier). 50 ng/ml PMA (InvivoGen) + 0.5 μM Ionomycin (InvivoGen)  
476 were used as a positive stimulation control for NK cell activation. After 3 washing steps in  
477 PBS/3%FCS, the cells were transferred to Flow cytometry tubes (BD) and analysed using a  
478 BD FACS Fortessa and FlowJo (V10) software. FcγRII or FcγRIII block was performed by  
479 addition of receptor specific mAbs (Stem cell technologies, IV.3 and 3G8) at a 1:100 dilution  
480 at the beginning of the incubation period. Cells were transferred to Flow cytometry tubes  
481 (BD) and analyzed using BD LSR Fortessa and FlowJo (V10) software.

482

483 *Asymmetric flow field flow fractionation (AF4)*: The AF4 system consisted of a flow  
484 controller (Eclipse AF4, Wyatt), a MALS detector (DAWN Heleos II, Wyatt), a UV detector  
485 (1260 Infinity G1314F, Agilent) and the separation channel (SC channel, PES membrane, cut-  
486 off 10 kDa, 490 μm spacer, wide type, Wyatt). Elution buffer: 1.15 g/L Na<sub>2</sub>HPO<sub>4</sub> (Merck),  
487 0.20 g/L NaH<sub>2</sub>PO<sub>4</sub> x H<sub>2</sub>O (Merck), 8.00 g/L NaCl (Sigma) and 0,20 g/L NaN<sub>3</sub> (Sigma),  
488 adjusted to pH 7.4, filtered through 0.1 μm. AF4 sequence (V<sub>x</sub> = cross flow in mL/min): (a)  
489 elution (2 min, V<sub>x</sub>: 1.0); (b) focus (1 min, V<sub>x</sub>: 1.0), focus + inject (1 min, V<sub>x</sub>: 1.0, inject flow:  
490 0.2 mL/min), repeated three times; (c) elution (30 min, linear V<sub>x</sub> gradient: 1.0 to 0.0); (d)  
491 elution (15 min, V<sub>x</sub>: 0.0); (e) elution + inject (5 min, V<sub>x</sub>: 0.0). A total protein mass of 17±0.3

492  $\mu\text{g}$  (Ifx, rhTNF $\alpha$  or ICs, respectively) was injected. The eluted sample concentration was  
493 calculated from the UV signal at 280 nm using extinction coefficients of 1.240 mL/(mg cm)  
494 or 1.450 mL/(mg cm) in the case of TNF $\alpha$  or Ifx, respectively. For the ICs, extinction  
495 coefficients were not available and difficult to calculate as the exact stoichiometry is not  
496 known. An extinction coefficient of 1.450 mL/(mg cm) was used for calculating the molar  
497 masses of all ICs. Especially in the case of ICs rich in TNF $\alpha$ , the true coefficients should be  
498 lower, and the molar masses of these complexes are overestimated by not more than 14 %.  
499 The determined molar masses for TNF $\alpha$ -rich complexes are therefore biased but the observed  
500 variations in molar mass for the different ICs remain valid. The mass-weighted mean of the  
501 distribution of molar masses for each sample was calculated using the ASTRA 7 software  
502 package (Wyatt).

503

504 *SLE patient cohort:* Sera from patients with SLE were obtained from the Immunologic,  
505 Rheumatologic Biobank (IR-B) of the Department of Rheumatology and Clinical  
506 Immunology. Biobanking and the project were approved by the local ethical committee of the  
507 University of Freiburg (votes 507/16 and 624/14). All patients who provided blood to the  
508 biobank had provided written informed consent. Ethical Statement: The study was designed in  
509 accordance with the guidelines of the Declaration of Helsinki (revised 2013). Patients with  
510 SLE ( $n = 25$ ) and healthy controls ( $n = 4$ ) were examined. All patients met the revised ACR  
511 classification criteria for SLE. Disease activity was assessed using the SLEDAI-2K score.  
512 C3d levels were analyzed in EDTA plasma using rocket double decker immune-  
513 electrophoresis with antisera against C3d (Polyclonal Rabbit Anti-Human C3d Complement,  
514 Agilent) and C3c (Polyclonal Rabbit Anti-Human C3c Complement Agilent) as previously  
515 described (72). Anti-human dsDNA antibodies titers were determined in serum using an anti-  
516 dsDNA IgG ELISA kit (diagnostik-a GmbH).

517

518 *Patient serum IC precipitation:* For polyethylene glycol (PEG) precipitation human sera were  
519 mixed with PEG 6000 (Sigma-Aldrich) in PBS at a final concentration of 10% PEG 6000.  
520 After overnight incubation at 4°C, ICs were precipitated by centrifugation at 2000 x g for  
521 30 min at 4 °C, pellets were washed once with PEG 6000 and then centrifugated at 2000 x g  
522 for 20 min at 4 °C. Supernatants were harvested and precipitates re-suspended in pre-warmed  
523 PBS for 1 h at 37 °C. IgG concentrations of serum, precipitates and supernatants obtained  
524 after precipitation were quantified by Nanodrop (Thermo Scientific™) measurement.

525

526 *Mice and Models:* Animal experiments were approved by the local governmental commission  
527 for animal protection of Freiburg (Regierungspräsidium Freiburg, approval no. G16/59 and  
528 G19/21). Lupus-prone (NZBxNZW)F1 mice (NZB/WF1) were generated by crossing  
529 NZB/BINJ mice with NZW/LacJ mice, purchased from The Jackson Laboratory. KRNTg mice  
530 were obtained from F. Nimmerjahn (Universität Erlangen-Nürnberg) with the permission of  
531 D. Mathis and C. Benoist (Harvard Medical School, Boston, MA), C57BL/6 mice (BL/6) and  
532 NOD/ShiLtJArc (NOD/Lt) mice were obtained from the Charles River Laboratories. K/BxN  
533 (KRNTgxNOD)F1 mice (K/BxN) were obtained by crossing KRNTg mice and NOD/Lt mice.  
534 All mice were housed in a 12-h light/dark cycle, with food and water ad libitum. Mice were  
535 euthanized and blood collected for serum preparation from 16 weeks old BL/6 animals, from  
536 16 weeks old arthritic K/BxN animals and from 26 – 38 weeks old NZB/WF1 mice with  
537 established glomerulonephritis.

538

539 *Statistical analyses:* Statistical analyses were performed using Graphpad Prism software (v6)  
540 and appropriate tests.

541

542

543

544 **Acknowledgements:** We thank T. Schleyer (IR-B Biobank) for providing patient samples.  
545 We are indebted to Falk. Nimmerjahn (Universität Erlangen-Nürnberg) for providing KRNtg  
546 mice. **Funding:** This work was supported by an intramural junior investigator fund of the  
547 Faculty of Medicine to PK (EQUIP - Funding for Medical Scientists, Faculty of Medicine,  
548 University of Freiburg), by the German Research foundation (DFG) (FOR2830 HE 2526/9-1)  
549 and NaFoUniMedCovid19“ (FKZ: 01KX2021) – COVIM and FKZ 100493916 B-FAST to  
550 HH, by the DFG research grant TRR130 to REV and the Ministry of Science, Research, and  
551 Arts Baden-Württemberg (Margarete von Wrangell Programm) to NC. **Author**  
552 **contributions:** HC and PK designed and developed the reporter system, conducted Fc-  
553 gamma receptor activation experiments and prepared synthetic immune complexes. AMP, US  
554 and REV manage the SLE patient cohort, provided sera and performed immune complex  
555 precipitation as well as IgG quantification. MH designed and performed AF4 analyses. NC  
556 manages the mouse models and provided sera. HH and PK supervised all experiments. HC  
557 and PK analysed and interpreted data. PK wrote the paper assisted by HC, AMP, MH, NC,  
558 REV and HH. **Competing interests:** The authors declare no financial and non-financial  
559 competing interests. **Data and materials availability:** All data associated with this study are  
560 present in the paper or Supplementary Materials.

561

562

### 563 **Supplementary Materials**

564 Fig. S1. rhTNF $\alpha$  is not toxic to mouse lymphocyte BW5147 cells even at high concentrations.

565 Fig. S2. AF4 elution profiles of Ixf/TNF $\alpha$ -immune complexes.

566 Table S1. Analysis of the molar mass distribution of ICs from AF4 data.

567

568 **References**

- 569 1. L. L. Lu, T. J. Suscovich, S. M. Fortune, G. Alter, Beyond binding: antibody effector  
570 functions in infectious diseases. *Nat Rev Immunol* **18**, 46-61 (2018).
- 571 2. J. V. Ravetch, S. Bolland, IgG Fc receptors. *Annu Rev Immunol* **19**, 275-290 (2001).
- 572 3. C. E. van der Poel, R. M. Spaapen, J. G. van de Winkel, J. H. Leusen, Functional  
573 characteristics of the high affinity IgG receptor, FcγRI. *J Immunol* **186**, 2699-  
574 2704 (2011).
- 575 4. P. Bruhns *et al.*, Specificity and affinity of human Fcγ receptors and their  
576 polymorphic variants for human IgG subclasses. *Blood* **113**, 3716-3725 (2009).
- 577 5. D. Urlaub *et al.*, Activation of natural killer cells by rituximab in granulomatosis with  
578 polyangiitis. *Arthritis Res Ther* **21**, 277 (2019).
- 579 6. A. Lux, X. Yu, C. N. Scanlan, F. Nimmerjahn, Impact of immune complex size and  
580 glycosylation on IgG binding to human FcγRI. *J Immunol* **190**, 4315-4323  
581 (2013).
- 582 7. F. Kiefer *et al.*, The Syk protein tyrosine kinase is essential for Fc gamma receptor  
583 signaling in macrophages and neutrophils. *Mol Cell Biol* **18**, 4209-4220 (1998).
- 584 8. Y. Luo, J. W. Pollard, A. Casadevall, Fcγ receptor cross-linking stimulates cell  
585 proliferation of macrophages via the ERK pathway. *J Biol Chem* **285**, 4232-4242  
586 (2010).
- 587 9. S. Greenberg, P. Chang, S. C. Silverstein, Tyrosine phosphorylation of the gamma  
588 subunit of Fc gamma receptors, p72syk, and paxillin during Fc receptor-mediated  
589 phagocytosis in macrophages. *J Biol Chem* **269**, 3897-3902 (1994).
- 590 10. S. Bournazos, T. T. Wang, R. Dahan, J. Maamary, J. V. Ravetch, Signaling by  
591 Antibodies: Recent Progress. *Annu Rev Immunol* **35**, 285-311 (2017).
- 592 11. F. Nimmerjahn, J. V. Ravetch, Antibody-mediated modulation of immune responses.  
593 *Immunol Rev* **236**, 265-275 (2010).
- 594 12. M. Heidelberger, F. E. Kendall, A Quantitative Study of the Precipitin Reaction  
595 between Type Iii Pneumococcus Polysaccharide and Purified Homologous Antibody.  
596 *J Exp Med* **50**, 809-823 (1929).
- 597 13. M. Heidelberger, F. E. Kendall, The Precipitin Reaction between Type Iii  
598 Pneumococcus Polysaccharide and Homologous Antibody : Iii. A Quantitative Study  
599 and a Theory of the Reaction Mechanism. *J Exp Med* **61**, 563-591 (1935).
- 600 14. A. M. Duchemin, L. K. Ernst, C. L. Anderson, Clustering of the High-Affinity Fc  
601 Receptor for Immunoglobulin-G (Fc-γ-Ri) Results in Phosphorylation of Its  
602 Associated γ-Chain. *J Biol Chem* **269**, 12111-12117 (1994).
- 603 15. A. Getahun, J. C. Cambier, Of ITIMs, ITAMs, and ITAMis: revisiting immunoglobulin  
604 Fc receptor signaling. *Immunol Rev* **268**, 66-73 (2015).
- 605 16. P. Bruhns, F. Jonsson, Mouse and human FcR effector functions. *Immunol Rev* **268**,  
606 25-51 (2015).
- 607 17. P. Bruhns, Properties of mouse and human IgG receptors and their contribution to  
608 disease models. *Blood* **119**, 5640-5649 (2012).
- 609 18. F. Nimmerjahn, J. V. Ravetch, Fcγ receptors as regulators of immune  
610 responses. *Nat Rev Immunol* **8**, 34-47 (2008).
- 611 19. F. Nimmerjahn, J. V. Ravetch, Fcγ receptors: old friends and new family  
612 members. *Immunity* **24**, 19-28 (2006).
- 613 20. M. Guilleams, P. Bruhns, Y. Saeys, H. Hammad, B. N. Lambrecht, The function of  
614 Fcγ receptors in dendritic cells and macrophages. *Nat Rev Immunol* **14**, 94-108  
615 (2014).
- 616 21. Z. K. Indik *et al.*, The high affinity Fc gamma receptor (CD64) induces phagocytosis in  
617 the absence of its cytoplasmic domain: the gamma subunit of Fc gamma RIIIA  
618 imparts phagocytic function to Fc gamma RI. *Exp Hematol* **22**, 599-606 (1994).
- 619 22. G. Fossati, R. C. Bucknall, S. W. Edwards, Insoluble and soluble immune complexes  
620 activate neutrophils by distinct activation mechanisms: changes in functional  
621 responses induced by priming with cytokines. *Ann Rheum Dis* **61**, 13-19 (2002).

- 622 23. J. J. Hubbard *et al.*, FcRn is a CD32a coreceptor that determines susceptibility to IgG  
623 immune complex-driven autoimmunity. *J Exp Med* **217**, (2020).
- 624 24. A. Pincetic *et al.*, Type I and type II Fc receptors regulate innate and adaptive  
625 immunity. *Nat Immunol* **15**, 707-716 (2014).
- 626 25. G. Vidarsson, G. Dekkers, T. Rispen, IgG subclasses and allotypes: from structure  
627 to effector functions. *Front Immunol* **5**, 520 (2014).
- 628 26. M. Z. Tay, K. Wiehe, J. Pollara, Antibody-Dependent Cellular Phagocytosis in  
629 Antiviral Immune Responses. *Front Immunol* **10**, 332 (2019).
- 630 27. E. A. Laborde *et al.*, Immune complexes inhibit differentiation, maturation, and  
631 function of human monocyte-derived dendritic cells. *J Immunol* **179**, 673-681 (2007).
- 632 28. S. Kang *et al.*, IgG-Immune Complexes Promote B Cell Memory by Inducing BAFF. *J*  
633 *Immunol* **196**, 196-206 (2016).
- 634 29. V. Granger, M. Peyneau, S. Chollet-Martin, L. de Chaisemartin, Neutrophil  
635 Extracellular Traps in Autoimmunity and Allergy: Immune Complexes at Work. *Front*  
636 *Immunol* **10**, 2824 (2019).
- 637 30. S. Berger, H. Ballo, H. J. Stutte, Immune complex-induced interleukin-6, interleukin-  
638 10 and prostaglandin secretion by human monocytes: A network of pro- and anti-  
639 inflammatory cytokines dependent on the antigen:antibody ratio. *Eur J Immunol* **26**,  
640 1297-1301 (1996).
- 641 31. L. Koenderman, Inside-Out Control of Fc-Receptors. *Front Immunol* **10**, 544 (2019).
- 642 32. R. Plomp *et al.*, Subclass-specific IgG glycosylation is associated with markers of  
643 inflammation and metabolic health. *Sci Rep* **7**, 12325 (2017).
- 644 33. T. C. Pierson *et al.*, The stoichiometry of antibody-mediated neutralization and  
645 enhancement of West Nile virus infection. *Cell Host Microbe* **1**, 135-145 (2007).
- 646 34. K. R. Patel, J. T. Roberts, A. W. Barb, Multiple Variables at the Leukocyte Cell  
647 Surface Impact Fc gamma Receptor-Dependent Mechanisms. *Front Immunol* **10**, 223  
648 (2019).
- 649 35. S. Bohm, D. Kao, F. Nimmerjahn, Sweet and sour: the role of glycosylation for the  
650 anti-inflammatory activity of immunoglobulin G. *Current topics in microbiology and*  
651 *immunology* **382**, 393-417 (2014).
- 652 36. R. J. Stopforth *et al.*, Detection of Experimental and Clinical Immune Complexes by  
653 Measuring SHIP-1 Recruitment to the Inhibitory FcgammaRIIB. *J Immunol* **200**, 1937-  
654 1950 (2018).
- 655 37. T. T. Wang, J. V. Ravetch, Immune complexes: not just an innocent bystander in  
656 chronic viral infection. *Immunity* **42**, 213-215 (2015).
- 657 38. D. H. Yamada *et al.*, Suppression of Fcgamma-receptor-mediated antibody effector  
658 function during persistent viral infection. *Immunity* **42**, 379-390 (2015).
- 659 39. U. Antes, H. P. Heinz, D. Schultz, D. Brackertz, M. Loos, C1q-bearing immune  
660 complexes detected by a monoclonal antibody to human C1q in rheumatoid arthritis  
661 sera and synovial fluids. *Rheumatol Int* **10**, 245-250 (1991).
- 662 40. R. H. Zubler *et al.*, Circulating and intra-articular immune complexes in patients with  
663 rheumatoid arthritis. Correlation of 125I-C1q binding activity with clinical and biological  
664 features of the disease. *J Clin Invest* **57**, 1308-1319 (1976).
- 665 41. D. Koffler, V. Agnello, R. Thoburn, H. G. Kunkel, Systemic lupus erythematosus:  
666 prototype of immune complex nephritis in man. *J Exp Med* **134**, 169-179 (1971).
- 667 42. T. V. Rajan, The Gell-Coombs classification of hypersensitivity reactions: a re-  
668 interpretation. *Trends in immunology* **24**, 376-379 (2003).
- 669 43. S. Tahir *et al.*, A CD153+CD4+ T follicular cell population with cell-senescence  
670 features plays a crucial role in lupus pathogenesis via osteopontin production. *J*  
671 *Immunol* **194**, 5725-5735 (2015).
- 672 44. A. Bano *et al.*, CD28 (null) CD4 T-cell expansions in autoimmune disease suggest a  
673 link with cytomegalovirus infection. *F1000Res* **8**, (2019).
- 674 45. E. Corrales-Aguilar *et al.*, A novel assay for detecting virus-specific antibodies  
675 triggering activation of Fcgamma receptors. *Journal of immunological methods* **387**,  
676 21-35 (2013).



- 677 46. H. A. D. Lagasse, H. Hengel, B. Golding, Z. E. Sauna, Fc-Fusion Drugs Have  
678 FcγR/C1q Binding and Signaling Properties That May Affect Their  
679 Immunogenicity. *AAPS J* **21**, 62 (2019).
- 680 47. S. Van den Hoecke *et al.*, Hierarchical and Redundant Roles of Activating  
681 FcγRs in Protection against Influenza Disease by M2e-Specific IgG1 and  
682 IgG2a Antibodies. *J Virol* **91**, (2017).
- 683 48. M. Tanaka *et al.*, Activation of FcγRI on monocytes triggers differentiation into  
684 immature dendritic cells that induce autoreactive T cell responses. *J Immunol* **183**,  
685 2349-2355 (2009).
- 686 49. S. Lisi, M. Sisto, D. D. Lofrumento, S. D'Amore, M. D'Amore, Advances in the  
687 understanding of the Fcγ receptors-mediated autoantibodies uptake. *Clin Exp*  
688 *Med* **11**, 1-10 (2011).
- 689 50. J. C. Anania, A. M. Chenoweth, B. D. Wines, P. M. Hogarth, The Human  
690 FcγRII (CD32) Family of Leukocyte FcR in Health and Disease. *Front Immunol*  
691 **10**, 464 (2019).
- 692 51. D. Metes *et al.*, Expression of functional CD32 molecules on human NK cells is  
693 determined by an allelic polymorphism of the FcγRIIC gene. *Blood* **91**, 2369-  
694 2380 (1998).
- 695 52. W. B. Breunis *et al.*, Copy number variation of the activating FCGR2C gene  
696 predisposes to idiopathic thrombocytopenic purpura. *Blood* **111**, 1029-1038 (2008).
- 697 53. F. Vuckovic *et al.*, Association of systemic lupus erythematosus with decreased  
698 immunosuppressive potential of the IgG glycome. *Arthritis Rheumatol* **67**, 2978-2989  
699 (2015).
- 700 54. Y. Kaneko, F. Nimmerjahn, J. V. Ravetch, Anti-inflammatory activity of  
701 immunoglobulin G resulting from Fc sialylation. *Science* **313**, 670-673 (2006).
- 702 55. P. Kolb *et al.*, Identification and Functional Characterization of a Novel Fcγ-  
703 Binding Glycoprotein in Rhesus Cytomegalovirus. *J Virol* **93**, (2019).
- 704 56. U. E. Nydegger, J. S. t. Davis, Soluble immune complexes in human disease. *CRC*  
705 *Crit Rev Clin Lab Sci* **12**, 123-170 (1980).
- 706 57. R. J. Levinsky, J. S. Cameron, J. F. Soothill, Serum immune complexes and disease  
707 activity in lupus nephritis. *Lancet* **1**, 564-567 (1977).
- 708 58. R. J. Levinsky, Role of circulating soluble immune complexes in disease. *Arch Dis*  
709 *Child* **53**, 96-99 (1978).
- 710 59. L. Briant, N. Coudronniere, V. Robert-Hebmann, M. Benkirane, C. Devaux, Binding of  
711 HIV-1 virions or gp120-anti-gp120 immune complexes to HIV-1-infected quiescent  
712 peripheral blood mononuclear cells reveals latent infection. *J Immunol* **156**, 3994-  
713 4004 (1996).
- 714 60. S. K. Oh *et al.*, Identification of HIV-1 envelope glycoprotein in the serum of AIDS and  
715 ARC patients. *J Acquir Immune Defic Syndr (1988)* **5**, 251-256 (1992).
- 716 61. D. A. Vuitton, L. Vuitton, E. Seilles, P. Galanaud, A plea for the pathogenic role of  
717 immune complexes in severe Covid-19. *Clin Immunol* **217**, 108493 (2020).
- 718 62. K. Madalinski, B. Burczynska, K. H. Heermann, A. Uy, W. H. Gerlich, Analysis of viral  
719 proteins in circulating immune complexes from chronic carriers of hepatitis B virus.  
720 *Clin Exp Immunol* **84**, 493-500 (1991).
- 721 63. D. A. Wetter, M. D. Davis, Lupus-like syndrome attributable to anti-tumor necrosis  
722 factor alpha therapy in 14 patients during an 8-year period at Mayo Clinic. *Mayo Clin*  
723 *Proc* **84**, 979-984 (2009).
- 724 64. D. A. MacDonald *et al.*, Aflibercept exhibits VEGF binding stoichiometry distinct from  
725 bevacizumab and does not support formation of immune-like complexes.  
726 *Angiogenesis* **19**, 389-406 (2016).
- 727 65. K. O. Saunders, Conceptual Approaches to Modulating Antibody Effector Functions  
728 and Circulation Half-Life. *Front Immunol* **10**, 1296 (2019).
- 729 66. T. Li *et al.*, Modulating IgG effector function by Fc glycan engineering. *Proceedings of*  
730 *the National Academy of Sciences of the United States of America* **114**, 3485-3490  
731 (2017).

- 732 67. M. R. Goodier *et al.*, Sustained Immune Complex-Mediated Reduction in CD16  
733 Expression after Vaccination Regulates NK Cell Function. *Front Immunol* **7**, 384  
734 (2016).
- 735 68. T. N. Mayadas, G. C. Tsokos, N. Tsuboi, Mechanisms of immune complex-mediated  
736 neutrophil recruitment and tissue injury. *Circulation* **120**, 2012-2024 (2009).
- 737 69. S. Nagarajan *et al.*, Cell-specific, activation-dependent regulation of neutrophil  
738 CD32A ligand-binding function. *Blood* **95**, 1069-1077 (2000).
- 739 70. K. Morizono *et al.*, Redirecting lentiviral vectors pseudotyped with Sindbis virus-  
740 derived envelope proteins to DC-SIGN by modification of N-linked glycans of  
741 envelope proteins. *J Virol* **84**, 6923-6934 (2010).
- 742 71. E. Corrales-Aguilar *et al.*, Human cytomegalovirus Fcγ binding proteins gp34  
743 and gp68 antagonize Fcγ receptors I, II and III. *PLoS pathogens* **10**, e1004131  
744 (2014).
- 745 72. E. Rother, B. Lang, R. Coldewey, K. Hartung, H. H. Peter, Complement split product  
746 C3d as an indicator of disease activity in systemic lupus erythematosus. *Clin*  
747 *Rheumatol* **12**, 31-35 (1993).

748

749

750 **Figures**

751

752 **Figure 1**

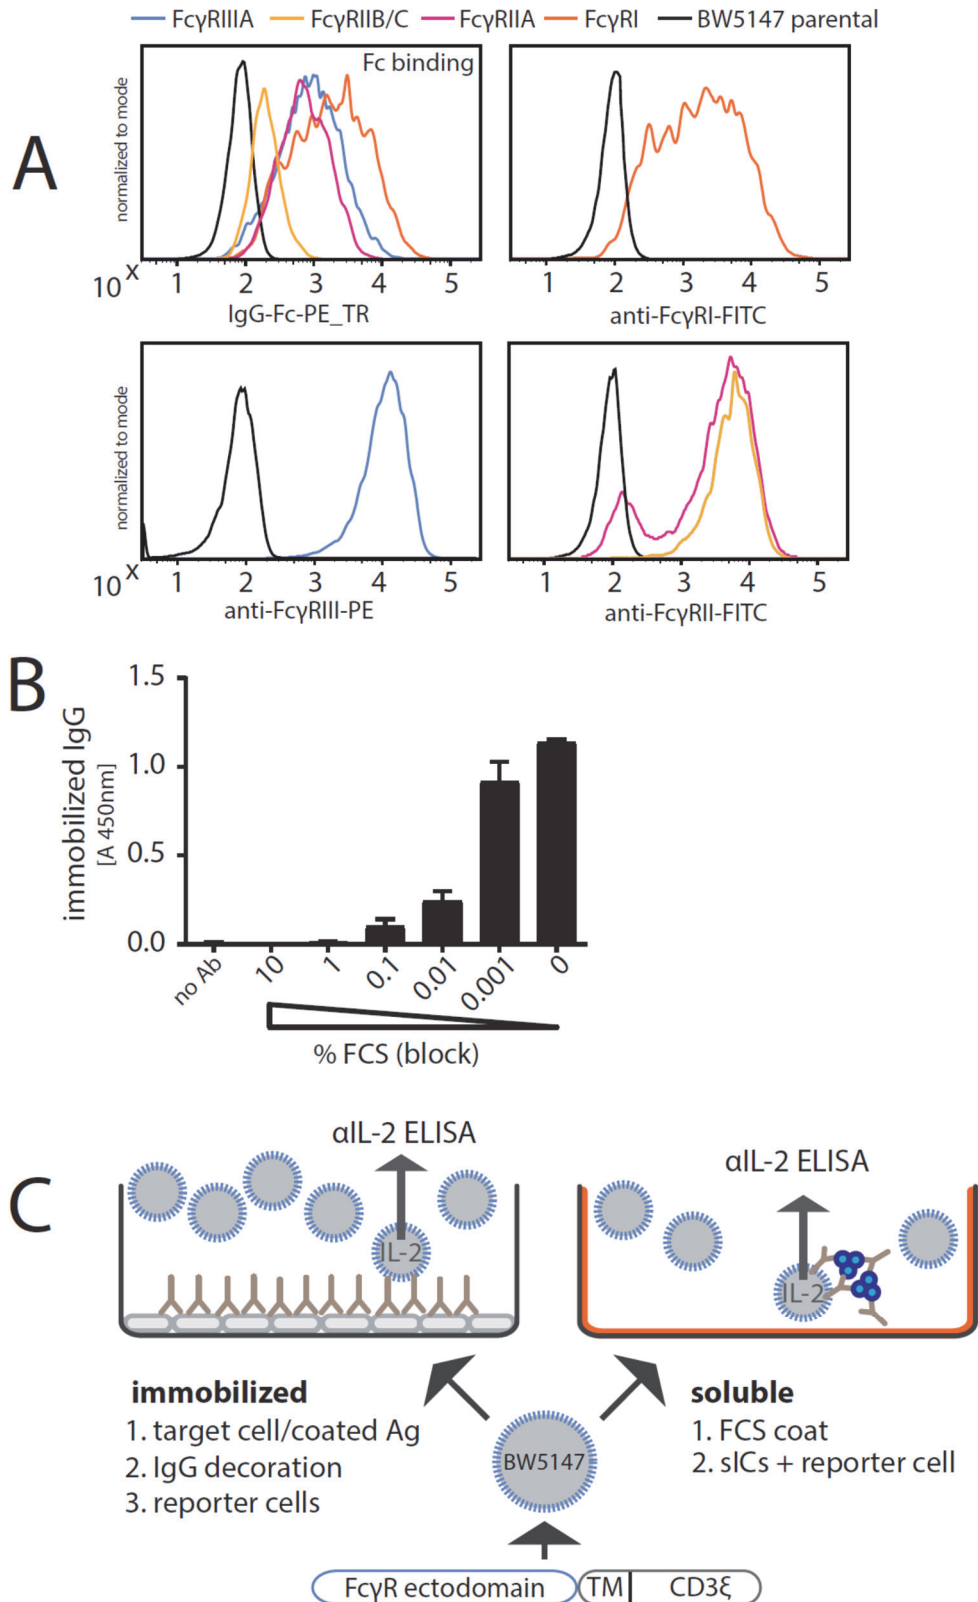

753

754

755 **Figure 2**

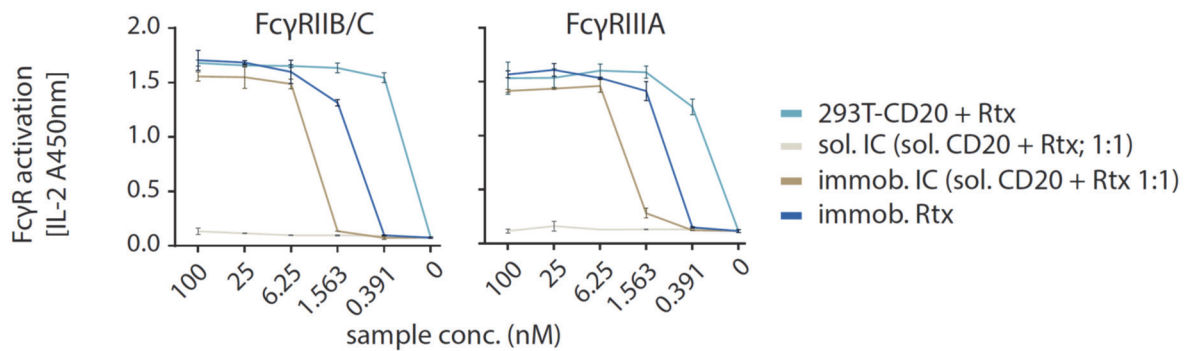

756

757 **Fig. 2. FcγRIIB/C and FcγRIIIA do not respond to small hetero-dimeric sICs but are**  
758 **sensitive to immobilized IgG/ICs.** Dose-dependent activation of FcγR-bearing reporter cells  
759 by immobilized IC can be mimicked by immobilized IgG. Response curves of human  
760 FcγRIIB/C and FcγRIIIA are similar between opsonized cells (293T cells stably expressing  
761 CD20 + Rtx), immobilized IC (rec. soluble CD20 + Rtx) and immobilized IgG (Rtx). sIC  
762 formed by monovalent antigen (rec. soluble CD20) do not activate human FcγRs. X-Axis  
763 shows sample concentration determined by antibody molarity. Y-Axis shows FcγR activation  
764 determined by reporter cell IL-2 production.

765

766 **Figure 3**

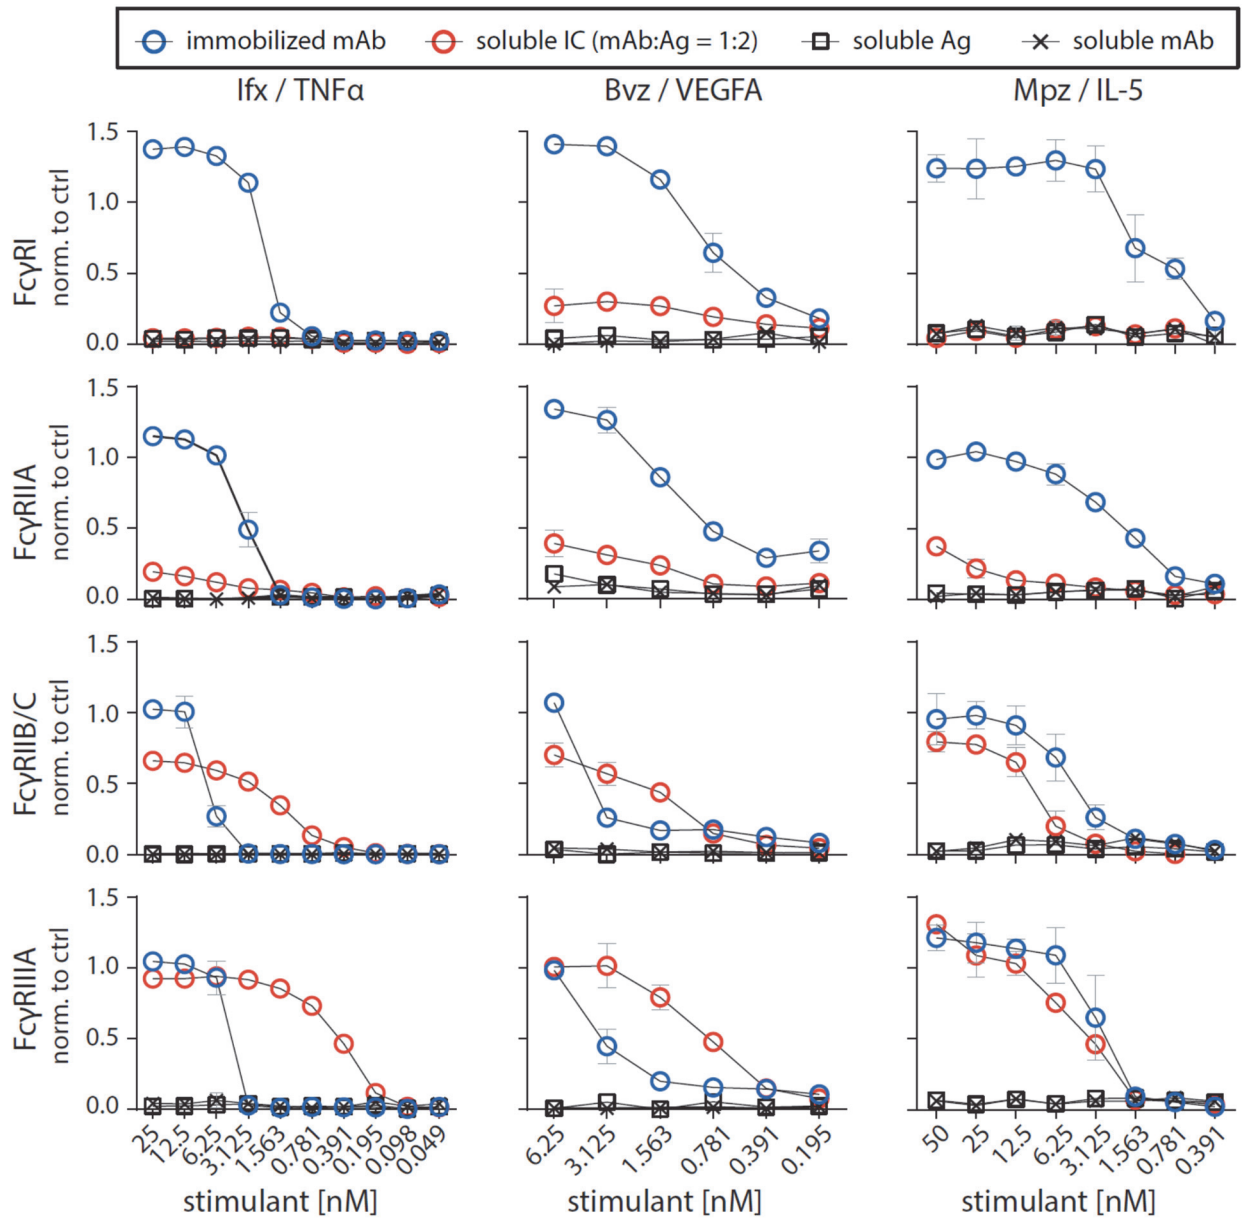

767  
768

769 **Fig. 3. FcγRIIB/C and FcγRIIIA are activated by sICs formed from multivalent**  
770 **antigens.** Three different multivalent ultra-pure antigens (Ag) mixed with respective therapy-  
771 grade mAbs were used to generate sICs as indicated for each set of graphs (top to bottom). IC  
772 pairs: infliximab (Ifx) and rhTNFα; mepolizumab (Mpz) and rhIL-5; bevacizumab (Bvz) and  
773 rhVEGFA. X-Axis: concentrations of stimulant expressed as molarity of either mAb or Ag  
774 monomer and IC (expressed as mAb molarity) at a mAb:Ag ratio of 1:2. Soluble antigen or  
775 soluble antibody alone served as negative controls and were not sufficient to activate human  
776 FcγRs. FcγR responses were normalized to immobilized rituximab (Rtx) at 1 μg/well (set to 1)  
777 and a medium control (set to 0). All FcγRs show dose-dependent activation towards  
778 immobilized IgG. FcγRIIA shows low activation at high sIC concentrations compared to  
779 immobilized IgG activation. FcγRI shows no activation towards sICs. FcγRIIIA and  
780 FcγRIIB/C are dose-dependently activated by sICs with responses comparable in strength to  
781 immobilized IgG stimulant. Experiments performed in technical replicates. Error bars = SD.  
782 Error bars smaller than symbols are not shown.

783 **Figure 4**

784

785

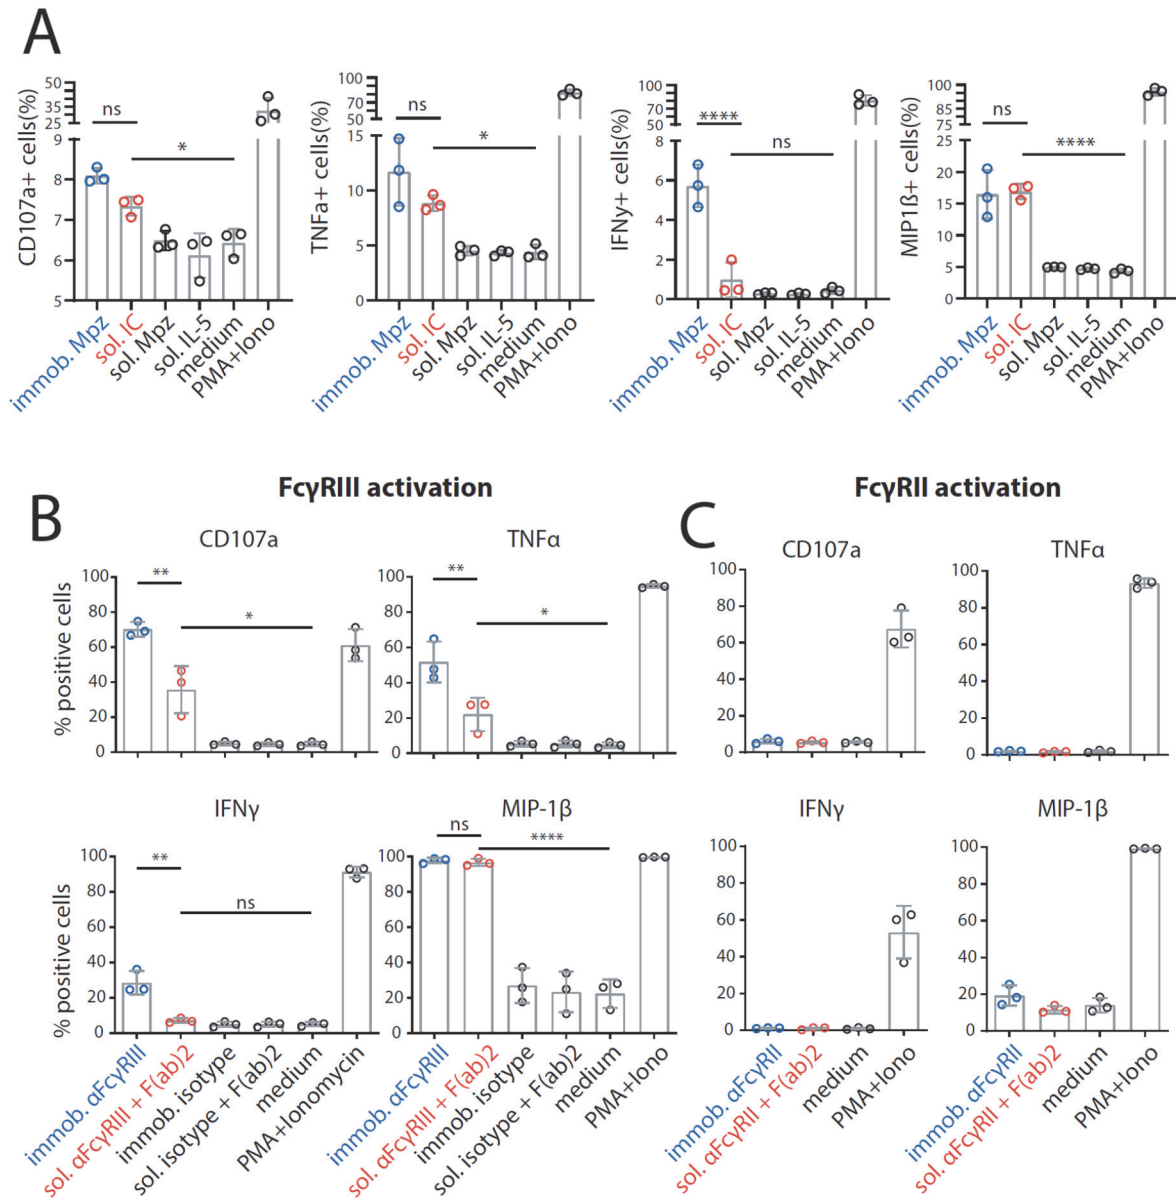

786

787

788

789 **Fig. 4. The FcγRIII-dependent activation pattern of primary NK cells depends on IC**  
790 **solubility.** Negatively selected primary NK cells purified from PBMCs of three healthy  
791 donors were tested for NK cell activation markers. Error bars = SD. Two-way ANOVA  
792 (Turkey). A) NK cells were incubated with immobilized IgG (mepolizumab, Mpz), soluble IC  
793 (Mpz:IL-5 = 1:1), soluble Mpz or soluble IL-5 (all at 200 nM, 10<sup>6</sup> cells). Incubation with  
794 PMA and Ionomycin (Iono) served as a positive control. Incubation with medium alone  
795 served as a negative control. B) NK cells were incubated for 4 h with immobilized FcγRIII-  
796 specific mAb, soluble mouse-anti-human IgG F(ab)<sub>2</sub> complexed FcγRIII-specific mAb  
797 (reverse sICs), immobilized IgG of non-FcγRIII-specificity (isotype control) or soluble F(ab)<sub>2</sub>  
798 complexed isotype control (all at 1 μg, 10<sup>6</sup> cells). Incubation with PMA and Ionomycin served  
799 as a positive control. Incubation with medium alone served as a negative control. C) As in B  
800 using an FcγRII-specific mAb. NK cells from the tested donors in this study do not react to  
801 FcγRII activation.



802 **Figure 5**

803

804

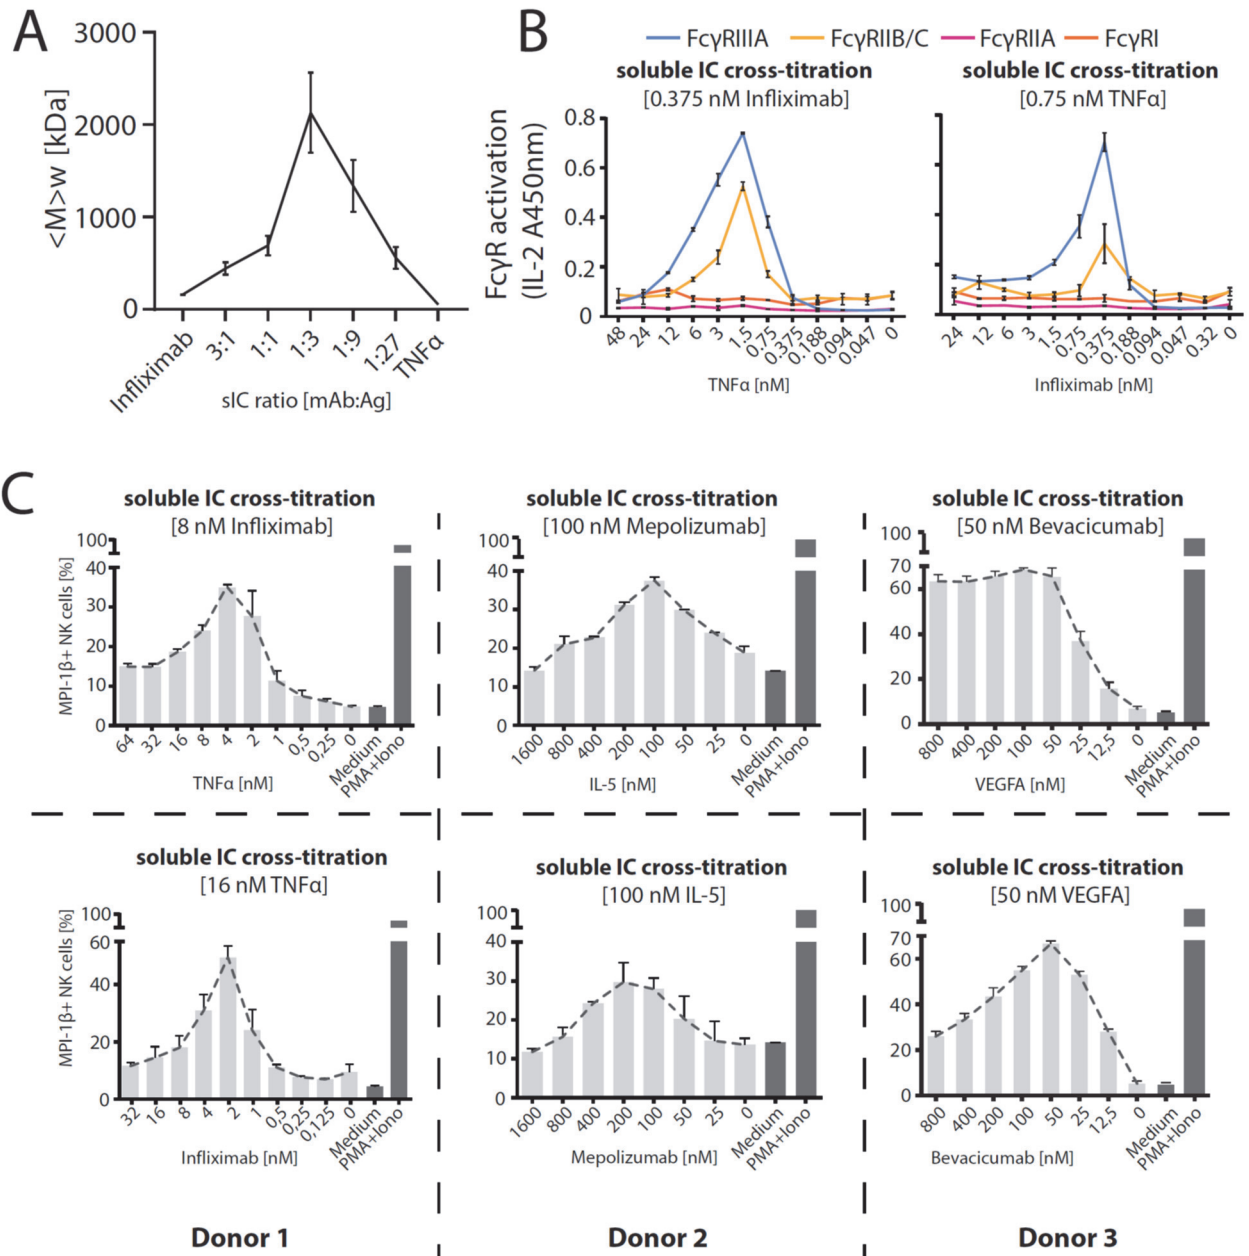

805

806

807 **Fig. 5. Fc $\gamma$ RIIB/C and Fc $\gamma$ R-IIIa respond to sIC size reproducing a Heidelberger-**  
808 **Kendall like precipitation curve.** A) infliximab (mAb) and rhTNF $\alpha$  (Ag) were mixed at  
809 different ratios (17  $\mu$ g total protein, calculated from monomer molarity) and analysed via  
810 AF4. sIC size is maximal at a 1:3 ratio of mAb:Ag and reduced when either mAb or Ag are  
811 given in excess.  $\langle M \rangle_w$  = mass-weighted mean of the molar mass distribution. Three  
812 independent experiments. Error bars = SD. Data taken from Table S1. One complete run  
813 analysis is shown in Fig. S2. B) Fc $\gamma$ R BW5147 reporter cell activation is sensitive to sIC size.  
814 sICs of different size were generated by cross-titration according to the AF4 determination.  
815 Reporter cells were incubated with fixed amounts of either mAb (infliximab, left) or Ag  
816 (rhTNF $\alpha$ , right) and titrated amounts of antigen or antibody, respectively. X-Axis shows  
817 titration of either antigen or antibody, respectively (TNF $\alpha$  calculated as monomer). IL-2  
818 production of reporter cells shows a peak for Fc $\gamma$ RIIB/C and Fc $\gamma$ RIIIa activation at an  
819 antibody:antigen ratio between 1:2 and 1:4. Fc $\gamma$ Rs I and IIa show no activation towards sICs  
820 in line with previous observations, see Fig.3. Two independent experiments. Error bars = SD.  
821 C) Purified primary NK cells from three different donors were incubated with cross-titrated  
822 sICs as in A. NK cells were measured for MIP-1 $\beta$  expression (% positivity). Incubation with  
823 PMA and Ionomycin served as a positive control. Incubation with medium alone served as a  
824 negative control. Measured in technical replicates. Error bars = SD.

825 **Figure 6**

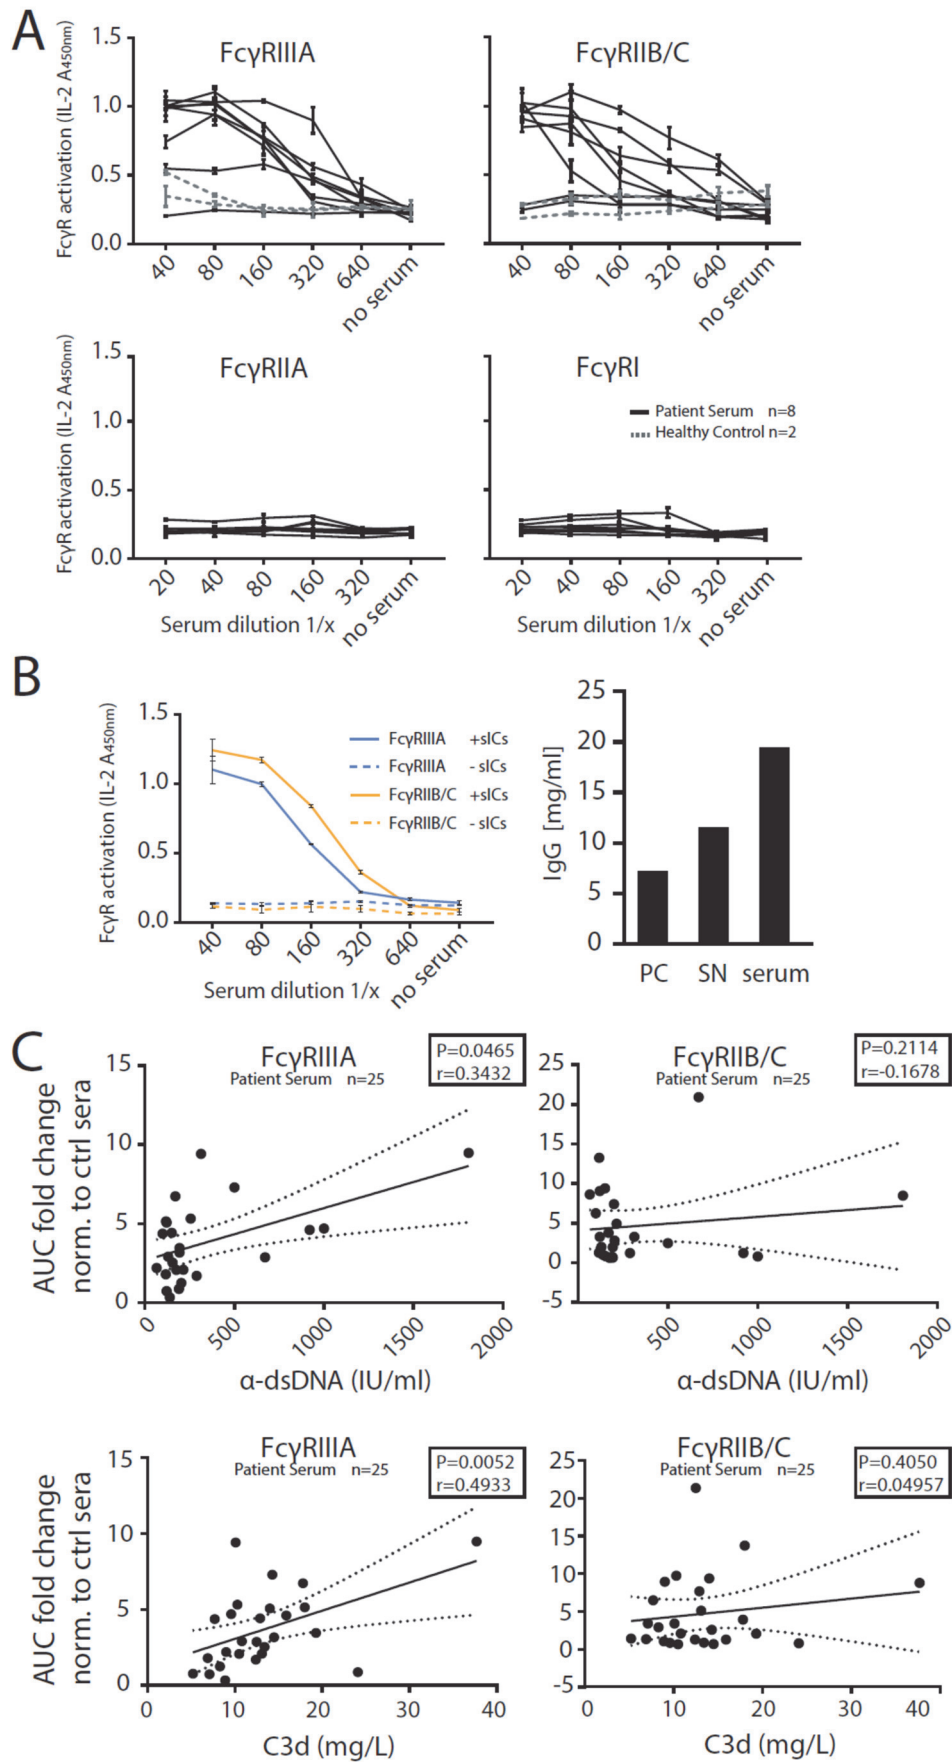

827 **Fig. 6. The reporter assay enables quantification of serum-derived sICs from SLE**  
828 **patients.** Serum derived sIC from systemic lupus erythematosus (SLE) patients activate  
829 human Fc $\gamma$ R reporter cells. 25 patients and 4 healthy control individuals were separated into  
830 three groups for measurement. A) Experiments shown for an exemplary group of 8 SLE  
831 patients and two healthy individuals. Dose-dependent reactivity of Fc $\gamma$ Rs IIIA and IIB/C was  
832 observed only for SLE patient sera and not for sera from healthy individuals. Fc $\gamma$ Rs I and IIA  
833 show no reactivity towards clinical IC in line with previous observations. B) Activation of  
834 Fc $\gamma$ Rs IIB/C and IIIA by patient serum is mediated by serum derived sICs. Patient serum  
835 samples were depleted of sICs by PEG precipitation and the supernatant (SN) was compared  
836 to untreated serum regarding Fc $\gamma$ R activation (left). Performed in technical replicates. IgG  
837 concentration in the precipitate (PC), supernatant (SN) or unfractionated serum respectively is  
838 shown in the bar graph (right). IC precipitation did leave non-complexed IgG in the  
839 supernatant. C) Fc $\gamma$ RIIIA activation, but not Fc $\gamma$ RIIB/C activation, significantly correlates  
840 with known SLE disease markers. Fc $\gamma$ R activation data from A was correlated to established  
841 SLE disease markers ( $\alpha$ -dsDNA levels indicated as IU/ml or C3d concentrations indicated as  
842 mg/L). Fc $\gamma$ R activation from a dose-response curve as in A was calculated as area under curve  
843 (AUC) for each SLE patient (n=25) or healthy individual (n=4) and expressed as fold change  
844 compared to the healthy control mean. SLE patients with  $\alpha$ -dsDNA levels below 50 IU/ml  
845 and C3d values below 6 mg/L were excluded. One-tailed Spearman's.

846

847

848 **Figure 7**

849

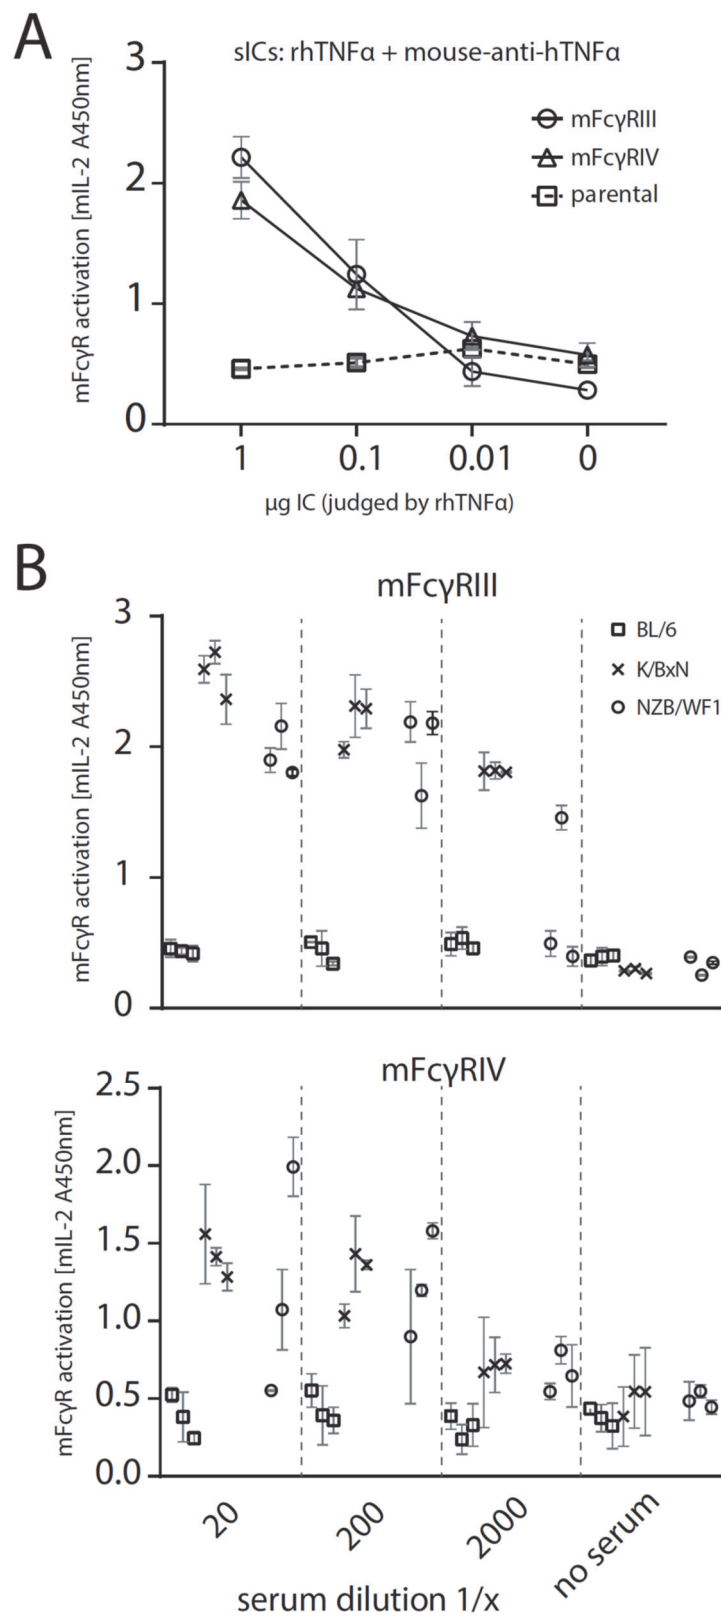

850

851

852 **Fig. 7. The reporter assay can be applied to mouse models of autoimmune disease. A)**

853 Reporter cells expressing mFcγRIII, mFcγRIV or parental BW5147 cells were incubated with

854 titrated amounts of synthetic sICs generated from rhTNFα and mouse-anti-hTNFα at a 1:1

855 ratio by mass. One experiment in technical replicates. Error bars = SD. B) Titrations of 3

856 mouse sera per group (C57BL/6, K/BxN or NZB/WF1) were incubated with mFcγR reporter

857 cells and FcγR activation was assessed as described above. Sera from BL/6 mice served as

858 negative control. Performed in technical replicates. Error bars = SD.

859

860

861

## -Supplementary Material-

862

863 **Figure S1**

864

865

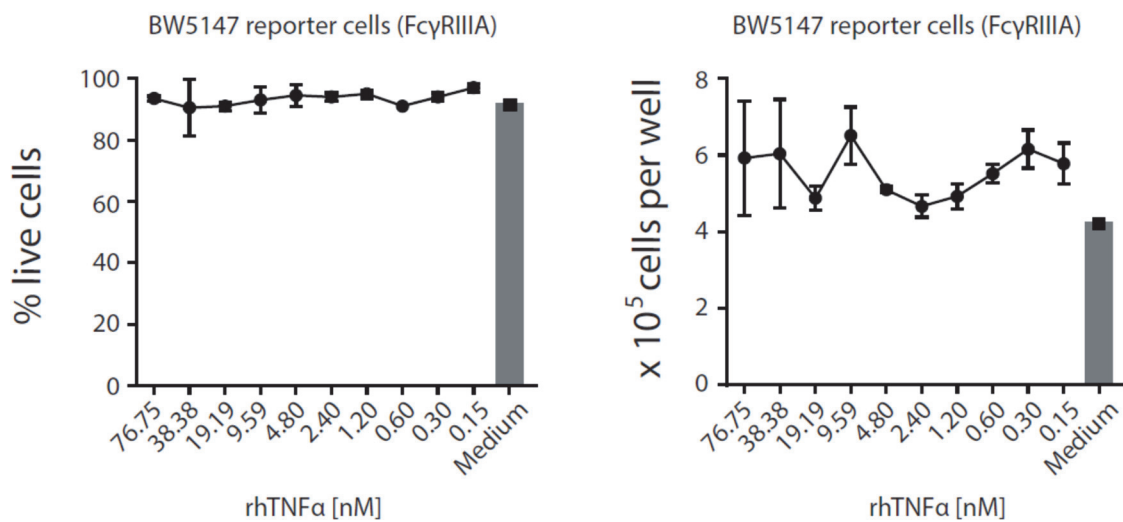

866

867 **Fig. S1. rhTNFα is not toxic to mouse lymphocyte BW5147 cells even at high**

868 **concentrations.** Cell count and percentage of live cells were unaltered over a 16 h time frame

869 of reporter cell culture in the presence of indicated rhTNFα concentrations and comparable to

870 regular growth in complete medium. Experiments were conducted in 3 replicates. Error bars =

871 SD.

872

873 **Figure S2**

874

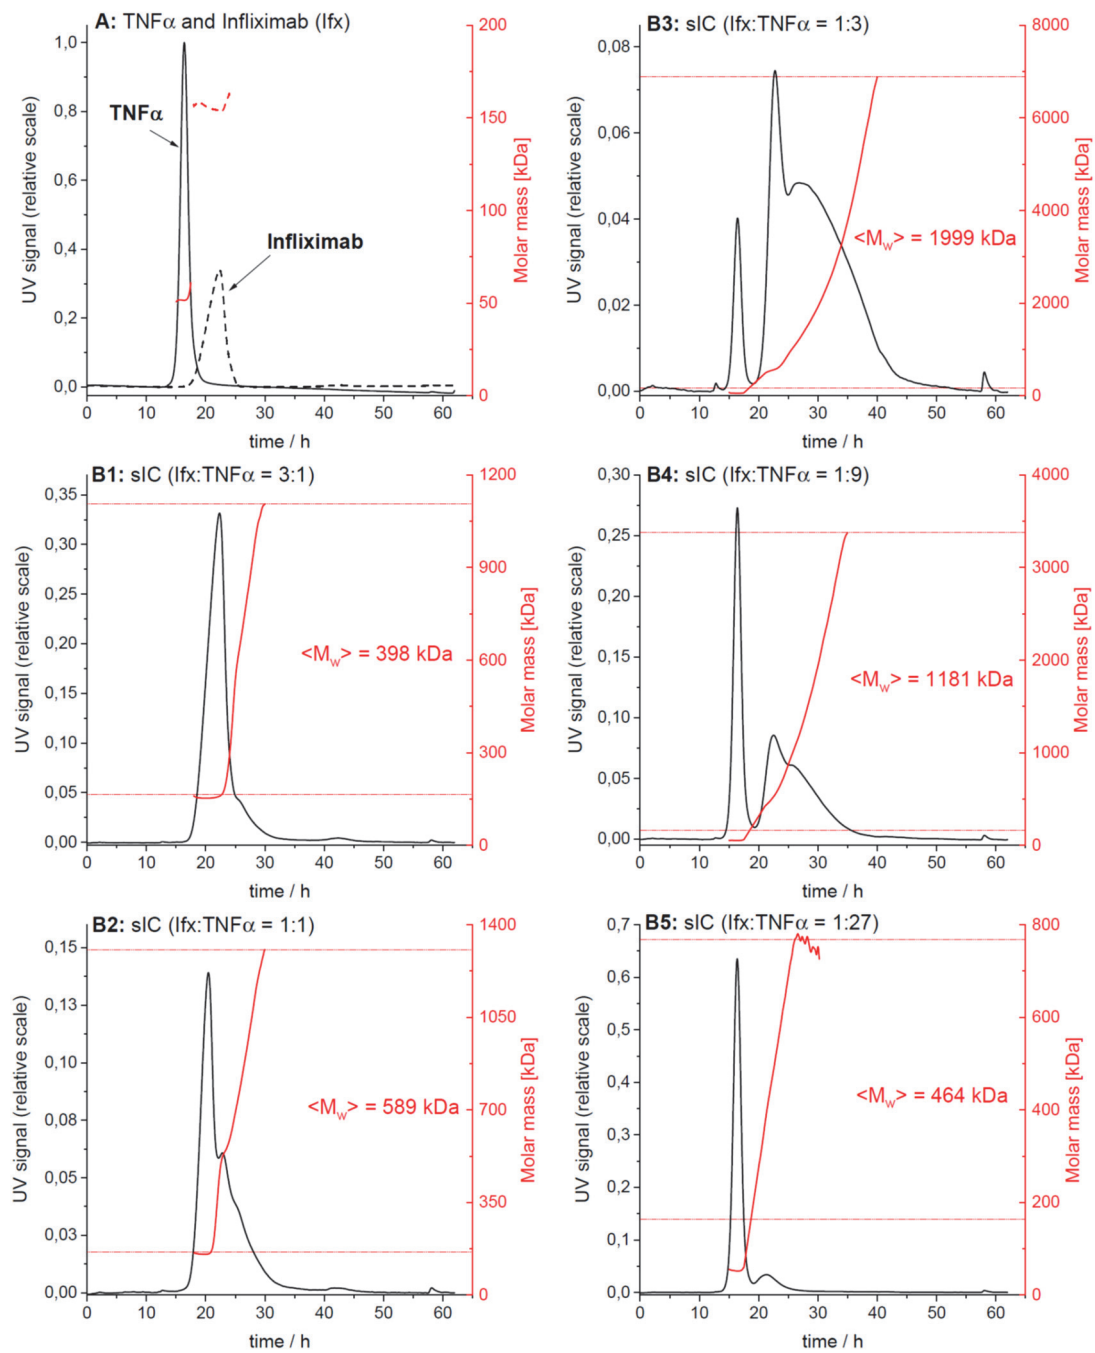

875

876



877 **Fig. S2. AF4 elution profiles of Ifx/TNF $\alpha$ -immune complexes.**

878 The elution profiles from one of three independent runs are shown. Protein concentration in  
 879 the eluate is shown in black (UV signal at  $\lambda = 280$  nm, normalized to the highest UV signal  
 880 found in this experiment), molar masses determined by MALS for a given retention time in  
 881 red. Horizontal red lines indicate the range of molar masses used to calculate the mass-  
 882 weighted mean of molar masses  $\langle M_w \rangle$ . A) Overlay of the elution profiles obtained for TNF $\alpha$   
 883 and Ifx, respectively; B1 to B5) Elution profiles for sICs formed after incubation of TNF $\alpha$  and  
 884 Ifx at different molar ratios.

885

886 **Table S1**

| Sample           | Range of assigned molar masses [kDa] |                                    |                                    | Mass-weighted mean of assigned molar masses [kDa] |                              |                              |                                        |
|------------------|--------------------------------------|------------------------------------|------------------------------------|---------------------------------------------------|------------------------------|------------------------------|----------------------------------------|
|                  | Run 1                                | Run 2                              | Run 3                              | Run 1                                             | Run 2                        | Run 3                        | Mean $\pm$ SD                          |
| Infliximab, IFX  | 158 – 182                            | 153 – 164                          | 159 – 193                          | 162                                               | 156                          | 163                          | 160 $\pm$ 4                            |
| TNF -alpha       | 52 – 55                              | 51 – 61                            | 52 – 62                            | 52                                                | 52                           | 52                           | 52 $\pm$ 0                             |
| Immune complexes |                                      |                                    |                                    |                                                   |                              |                              |                                        |
| IFX/TNF 3:1      | 182 – 1.16 $\cdot$ 10 <sup>3</sup>   | 164 – 1.11 $\cdot$ 10 <sup>3</sup> | 193 – 1.10 $\cdot$ 10 <sup>3</sup> | 409                                               | 398                          | 518                          | 442 $\pm$ 66                           |
| IFX/TNF 1:1      | 182 – 2.06 $\cdot$ 10 <sup>3</sup>   | 164 – 1.31 $\cdot$ 10 <sup>3</sup> | 193 – 1.42 $\cdot$ 10 <sup>3</sup> | 801                                               | 589                          | 681                          | 690 $\pm$ 106                          |
| IFX/TNF 1:3      | 182 – 5.05 $\cdot$ 10 <sup>3</sup>   | 164 – 6.89 $\cdot$ 10 <sup>3</sup> | 193 – 10.8 $\cdot$ 10 <sup>3</sup> | 1.77 $\cdot$ 10 <sup>3</sup>                      | 2.00 $\cdot$ 10 <sup>3</sup> | 2.61 $\cdot$ 10 <sup>3</sup> | 2.13 $\cdot$ 10 <sup>3</sup> $\pm$ 435 |
| IFX/TNF 1:9      | 182 – 5.36 $\cdot$ 10 <sup>3</sup>   | 164 – 3.38 $\cdot$ 10 <sup>3</sup> | 193 – 3.51 $\cdot$ 10 <sup>3</sup> | 1.66 $\cdot$ 10 <sup>3</sup>                      | 1.18 $\cdot$ 10 <sup>3</sup> | 1.17 $\cdot$ 10 <sup>3</sup> | 1.34 $\cdot$ 10 <sup>3</sup> $\pm$ 279 |
| IFX/TNF 1:27     | 182 – 1.68 $\cdot$ 10 <sup>3</sup>   | 164 – 768                          | 193 – 1.01 $\cdot$ 10 <sup>3</sup> | 689                                               | 464                          | 521                          | 558 $\pm$ 117                          |

887

888 **Table S1. Analysis of the molar mass distribution of ICs from AF4 data.**

889 For a given elution time, the AF4 profiles provide the concentration (UV) at which a given  
 890 molar mass (MALS) of a protein is present in the sample. The molar mass distribution of Ifx,  
 891 TNF $\alpha$  and their immune complexes (sICs) was obtained by plotting the cumulative frequency  
 892 as a function of molar mass. For a selected range of molar masses, a mass-weighted mean  
 893 value ( $\langle M_w \rangle$ ) was calculated. All detected molar masses were selected in the case of Ifx and  
 894 TNF $\alpha$  whereas only molar masses larger than the maximal molar mass found for Ifx were  
 895 assigned to sICs. The table shows the range of assigned molar masses and the calculated  
 896  $\langle M_w \rangle$  for each AF4 run (n = 3).
